# Supplementary material
Source: PubMed Central journal article supplement (PMC4687559)
Supplement: pnas.1513872112.sd01.pdf [file pnas.1513872112.sd01.pdf]

| SYMBOL            | DEFINITION                                                                                                            | control avg signal | GRA avg signal | adjusted p-value |
|-------------------|-----------------------------------------------------------------------------------------------------------------------|--------------------|----------------|------------------|
| Gcgr              | Mus musculus glucagon receptor (Gcgr), mRNA.                                                                          | 599.5118           | 240.2993       | 3.49539E-20      |
| Cyp2d9            | Mus musculus cytochrome P450, family 2, subfamily d, polypeptide 9 (Cyp2d9), mRNA.                                    | 13229.19           | 5271.515       | 2.35031E-20      |
| OTTMUSG0000000231 | Mus musculus predicted gene, OTTMUSG00000000231 (OTTMUSG00000000231), mRNA.                                           | 6673.484           | 3011.266       | 9.82006E-18      |
| LOC100047200      | PREDICTED: Mus musculus similar to T-box 3 protein (LOC100047200), mRNA.                                              | 134.152            | 41.48467       | 1.33078E-17      |
| Hyal1             | Mus musculus hyaluronoglucosaminidase 1 (Hyal1), mRNA.                                                                | 170.8323           | 37.0004        | 4.00466E-16      |
| Ube2o             | Mus musculus ubiquitin-conjugating enzyme E2O (Ube2o), mRNA.                                                          | 246.4295           | 102.7507       | 4.30293E-15      |
| Ube2l3            | Mus musculus ubiquitin-conjugating enzyme E2L 3 (Ube2l3), mRNA.                                                       | 785.9551           | 387.7182       | 9.33851E-14      |
| Dag1              | Mus musculus dystroglycan 1 (Dag1), mRNA.                                                                             | 337.9107           | 100.7334       | 2.47517E-13      |
| Decr1             | Mus musculus 2,4-dienoyl CoA reductase 1, mitochondrial (Decr1), nuclear gene encoding mitochondrial protein, mRNA.   | 348.4006           | 116.8953       | 4.33005E-13      |
| Eif4ebp2          | Mus musculus eukaryotic translation initiation factor 4E binding protein 2 (Eif4ebp2), mRNA.                          | 550.9578           | 126.0966       | 7.18829E-13      |
| Plekhb1           | Mus musculus pleckstrin homology domain containing, family B (evectins) member 1 (Plekhb1), mRNA.                     | 208.2508           | 75.93501       | 6.77677E-13      |
| Cyp4f13           | Mus musculus cytochrome P450, family 4, subfamily f, polypeptide 13 (Cyp4f13), mRNA.                                  | 875.9039           | 448.3336       | 1.47491E-11      |
| Plod3             | Mus musculus procollagen-lysine, 2-oxoglutarate 5-dioxygenase 3 (Plod3), mRNA.                                        | 297.5273           | 143.593        | 2.24405E-11      |
| Ddx3x             | Mus musculus DEAD/H (Asp-Glu-Ala-Asp/His) box polypeptide 3, X-linked (Ddx3x), mRNA.                                  | 332.186            | 145.5089       | 1.67089E-10      |
| Tesk1             | Mus musculus testis specific protein kinase 1 (Tesk1), mRNA.                                                          | 249.6093           | 122.6802       | 3.46557E-10      |
| Pex11a            | Mus musculus peroxisomal biogenesis factor 11a (Pex11a), mRNA.                                                        | 1324.675           | 418.3101       | 3.89785E-10      |
| Aldh1b1           | Mus musculus aldehyde dehydrogenase 1 family, member B1 (Aldh1b1), nuclear gene encoding mitochondrial protein, mRNA. | 159.221            | 500.3054       | 8.84212E-10      |
| Bmper             | Mus musculus BMP-binding endothelial regulator (Bmper), mRNA.                                                         | 34.67572           | 137.2951       | 1.37405E-09      |
| Blvrb             | Mus musculus biliverdin reductase B (flavin reductase (NADPH)) (Blvrb), mRNA.                                         | 2002.296           | 1105.116       | 1.84723E-09      |
| Abtb1             | Mus musculus ankyrin repeat and BTB (POZ) domain containing 1 (Abtb1), mRNA.                                          | 124.2224           | 54.18681       | 1.77087E-09      |
| Abcg8             | Mus musculus ATP-binding cassette, sub-family G (WHITE), member 8 (Abcg8), mRNA.                                      | 495.9326           | 215.4574       | 3.24016E-09      |
| Cenpb             | Mus musculus centromere protein B (Cenpb), mRNA.                                                                      | 516.4761           | 220.3838       | 4.83797E-09      |
| Cyp4a12b          | Mus musculus cytochrome P450, family 4, subfamily a, polypeptide 12B (Cyp4a12b), mRNA.                                | 2225.318           | 1246.026       | 4.70184E-09      |
| Esm1              | Mus musculus endothelial cell-specific molecule 1 (Esm1), mRNA.                                                       | 51.07189           | 173.6499       | 6.67674E-09      |
| Alad              | Mus musculus aminolevulinate, delta-, dehydratase (Alad), mRNA.                                                       | 1357.973           | 763.0587       | 9.19677E-09      |
| Vcam1             | Mus musculus vascular cell adhesion molecule 1 (Vcam1), mRNA.                                                         | 230.7449           | 616.6646       | 9.26216E-09      |
| Itgb5             | Mus musculus integrin beta 5 (Itgb5), mRNA.                                                                           | 286.4113           | 151.0588       | 9.18971E-09      |
| Stat3             | Mus musculus signal transducer and activator of transcription 3 (Stat3), transcript variant 1, mRNA.                  | 367.8292           | 147.3232       | 1.08103E-08      |
| Dym               | Mus musculus dymeclin (Dym), mRNA.                                                                                    | 520.1229           | 286.097        | 1.07849E-08      |
| Snx8              | Mus musculus sorting nexin 8 (Snx8), mRNA.                                                                            | 204.7944           | 104.5963       | 1.34031E-08      |

|                    |                                                                                                           |          |          |             |
|--------------------|-----------------------------------------------------------------------------------------------------------|----------|----------|-------------|
| Zdhhc4             | Mus musculus zinc finger, DHHC domain containing 4 (Zdhhc4), mRNA.                                        | 279.6287 | 149.0066 | 1.8776E-08  |
| Suds3              | Mus musculus suppressor of defective silencing 3 homolog (S. cerevisiae) (Suds3), mRNA.                   | 1208.613 | 685.894  | 1.8265E-08  |
| Vgll4              | Mus musculus vestigial like 4 (Drosophila) (Vgll4), mRNA.                                                 | 96.19109 | 25.7937  | 2.03702E-08 |
| Rbp1               |                                                                                                           | 57.01354 | 176.2375 | 2.42034E-08 |
| Pank3              | Mus musculus pantothenate kinase 3 (Pank3), mRNA.                                                         | 57.39725 | 14.24635 | 3.58323E-08 |
| Bace1              | Mus musculus beta-site APP cleaving enzyme 1 (Bace1), mRNA.                                               | 270.9391 | 145.7825 | 3.75684E-08 |
| Slc35e3            | Mus musculus solute carrier family 35, member E3 (Slc35e3), mRNA.                                         | 423.4763 | 235.3445 | 3.71252E-08 |
| LOC677317          | PREDICTED: Mus musculus similar to Mod1 protein, transcript variant 4 (LOC677317), mRNA.                  | 691.6146 | 387.9594 | 4.47146E-08 |
| Vars2              | Mus musculus valyl-tRNA synthetase 2, mitochondrial (putative) (Vars2), mRNA.                             | 124.3525 | 58.74606 | 4.50403E-08 |
| Brp17              |                                                                                                           | 729.1403 | 387.5197 | 6.60568E-08 |
| OTTMUSG00000007485 | Mus musculus predicted gene, OTTMUSG00000007485 (OTTMUSG00000007485), mRNA.                               | 6953.422 | 4082.104 | 7.66257E-08 |
| Vcp                | Mus musculus valosin containing protein (Vcp), mRNA.                                                      | 2694.123 | 1577.154 | 8.13434E-08 |
| Gpn2               | Mus musculus GPN-loop GTPase 2 (Gpn2), mRNA.                                                              | 260.4283 | 141.7217 | 8.36859E-08 |
| Bop1               | Mus musculus block of proliferation 1 (Bop1), mRNA.                                                       | 138.461  | 68.37168 | 8.70715E-08 |
| Pskh1              | Mus musculus protein serine kinase H1 (Pskh1), mRNA.                                                      | 700.0449 | 368.2853 | 9.37206E-08 |
| Prkacb             | Mus musculus protein kinase, cAMP dependent, catalytic, beta (Prkacb), mRNA.                              | 1173.36  | 688.5854 | 1.70263E-07 |
| Enpp4              | Mus musculus ectonucleotide pyrophosphatase/phosphodiesterase 4 (Enpp4), mRNA.                            | 105.5941 | 26.62142 | 2.17747E-07 |
| Gna13              |                                                                                                           | 321.2663 | 123.4486 | 2.16025E-07 |
| Nelf               | Mus musculus nasal embryonic LHRH factor (Nelf), transcript variant 2, mRNA.                              | 454.1578 | 269.478  | 2.12707E-07 |
| Brf2               | Mus musculus BRF2, subunit of RNA polymerase III transcription initiation factor, BRF1-like (Brf2), mRNA. | 75.96768 | 30.40844 | 2.38883E-07 |
| Gbf1               | Mus musculus golgi-specific brefeldin A-resistance factor 1 (Gbf1), mRNA.                                 | 239.3071 | 105.4248 | 2.47E-07    |
| 2610003J06Rik      | Mus musculus RIKEN cDNA 2610003J06 gene (2610003J06Rik), mRNA.                                            | 214.9995 | 72.99356 | 3.35842E-07 |
| Glg1               | Mus musculus golgi apparatus protein 1 (Glg1), mRNA.                                                      | 577.4692 | 223.6656 | 3.77543E-07 |
| Ndst1              | Mus musculus N-deacetylase/N-sulfotransferase (heparan glucosaminyl) 1 (Ndst1), mRNA.                     | 257.3795 | 114.901  | 3.9511E-07  |
| Mgrn1              | Mus musculus mahogunin, ring finger 1 (Mgrn1), mRNA.                                                      | 937.6097 | 556.0054 | 4.00898E-07 |
| Josd2              | Mus musculus Josephin domain containing 2 (Josd2), mRNA.                                                  | 214.1166 | 116.6686 | 4.19689E-07 |
| Prkcbp1            | Mus musculus protein kinase C binding protein 1 (Prkcbp1), mRNA.                                          | 57.51709 | 16.44544 | 4.83671E-07 |
| Fbxo6              | Mus musculus F-box protein 6 (Fbxo6), mRNA.                                                               | 1178.056 | 706.1625 | 6.26028E-07 |
| Aldh3a2            | Mus musculus aldehyde dehydrogenase family 3, subfamily A2 (Aldh3a2), mRNA.                               | 4013.412 | 2182.313 | 6.78267E-07 |
| Lpin2              |                                                                                                           | 497.1498 | 127.9359 | 6.81821E-07 |
| Gclc               | Mus musculus glutamate-cysteine ligase, catalytic subunit (Gclc), mRNA.                                   | 88.67309 | 39.97111 | 6.76045E-07 |
| Rps6ka1            | Mus musculus ribosomal protein S6 kinase polypeptide 1 (Rps6ka1), mRNA.                                   | 141.9508 | 40.51731 | 9.91553E-07 |
| Guk1               | Mus musculus guanylate kinase 1 (Guk1), mRNA.                                                             | 564.2975 | 335.6206 | 1.0332E-06  |
| Keap1              | Mus musculus kelch-like ECH-associated protein 1 (Keap1), mRNA.                                           | 241.6244 | 112.6238 | 1.03444E-06 |
| F2r                | Mus musculus coagulation factor II (thrombin) receptor (F2r), mRNA.                                       | 856.804  | 515.328  | 1.03314E-06 |

|               |                                                                                                                           |          |          |             |
|---------------|---------------------------------------------------------------------------------------------------------------------------|----------|----------|-------------|
| Ecsit         | Mus musculus ECSIT homolog (Drosophila) (Ecsit), mRNA.                                                                    | 438.9596 | 258.9996 | 1.09039E-06 |
| Actb          | Mus musculus actin, beta (Actb), mRNA.                                                                                    | 1522.379 | 519.6579 | 1.15228E-06 |
| Uroc1         | Mus musculus urocanase domain containing 1 (Uroc1), mRNA.                                                                 | 2660.887 | 1084.264 | 1.2623E-06  |
| Smek2         | Mus musculus SMEK homolog 2, suppressor of mek1 (Dictyostelium) (Smek2), mRNA.                                            | 163.7793 | 69.93829 | 1.35112E-06 |
| Gpd2          | Mus musculus glycerol phosphate dehydrogenase 2, mitochondrial (Gpd2), nuclear gene encoding mitochondrial protein, mRNA. | 92.9932  | 40.77112 | 1.91262E-06 |
| Kpnb1         | Mus musculus karyopherin (importin) beta 1 (Kpnb1), mRNA.                                                                 | 149.0889 | 80.43443 | 2.08089E-06 |
| 2410018C17Rik | Mus musculus RIKEN cDNA 2410018C17 gene (2410018C17Rik), mRNA.                                                            | 547.0358 | 311.9904 | 2.27857E-06 |
| Appbp2        |                                                                                                                           | 266.1971 | 137.2951 | 2.25597E-06 |
| Vps18         | Mus musculus vacuolar protein sorting 18 (yeast) (Vps18), mRNA.                                                           | 109.1096 | 55.24878 | 2.85191E-06 |
| Tff3          | Mus musculus trefoil factor 3, intestinal (Tff3), mRNA.                                                                   | 36.22052 | 251.1593 | 3.03829E-06 |
| 2310022B05Rik | Mus musculus RIKEN cDNA 2310022B05 gene (2310022B05Rik), mRNA.                                                            | 131.3279 | 69.74871 | 3.00665E-06 |
| Samd4b        | Mus musculus sterile alpha motif domain containing 4B (Samd4b), mRNA.                                                     | 30.12625 | 84.56062 | 3.93538E-06 |
| Sds           | Mus musculus serine dehydratase (Sds), mRNA.                                                                              | 2712.502 | 5500.665 | 3.91665E-06 |
| Irs2          | Mus musculus insulin receptor substrate 2 (Irs2), mRNA.                                                                   | 138.2198 | 20.37332 | 4.23995E-06 |
| Smoc1         | Mus musculus SPARC related modular calcium binding 1 (Smoc1), mRNA.                                                       | 791.2791 | 486.9743 | 4.35317E-06 |
| Cc2d1a        | Mus musculus coiled-coil and C2 domain containing 1A (Cc2d1a), mRNA.                                                      | 82.00159 | 28.82672 | 4.3025E-06  |
| Hspb6         | Mus musculus heat shock protein, alpha-crystallin-related, B6 (Hspb6), mRNA.                                              | 640.2319 | 290.5077 | 4.27233E-06 |
| Tmem177       | Mus musculus transmembrane protein 177 (Tmem177), mRNA.                                                                   | 105.4446 | 53.54723 | 4.26836E-06 |
| Spon2         | Mus musculus spondin 2, extracellular matrix protein (Spon2), mRNA.                                                       | 505.7981 | 229.8223 | 4.39373E-06 |
| Lcn13         | Mus musculus lipocalin 13 (Lcn13), mRNA.                                                                                  | 68.03056 | 4.38422  | 4.51532E-06 |
| Atp1b1        | Mus musculus ATPase, Na+/K+ transporting, beta 1 polypeptide (Atp1b1), mRNA.                                              | 687.807  | 1332.845 | 4.70627E-06 |
| Agxt2l1       | Mus musculus alanine-glyoxylate aminotransferase 2-like 1 (Agxt2l1), mRNA.                                                | 634.4612 | 1264.579 | 5.39012E-06 |
| Eif3d         | Mus musculus eukaryotic translation initiation factor 3, subunit D (Eif3d), mRNA.                                         | 1085.645 | 488.4691 | 5.51236E-06 |
| Mrpl2         | Mus musculus mitochondrial ribosomal protein L2 (Mrpl2), nuclear gene encoding mitochondrial protein, mRNA.               | 456.9936 | 269.0317 | 5.51181E-06 |
| Tcf25         | Mus musculus transcription factor 25 (basic helix-loop-helix) (Tcf25), transcript variant 1, mRNA.                        | 618.7607 | 454.9157 | 7.43375E-06 |
| Rnf10         | Mus musculus ring finger protein 10 (Rnf10), mRNA.                                                                        | 1155.147 | 722.5521 | 7.35228E-06 |
| Cln3          | Mus musculus ceroid lipofuscinosis, neuronal 3, juvenile (Batten, Spielmeyer-Vogt disease) (Cln3), mRNA.                  | 148.6989 | 80.48221 | 7.74982E-06 |
| Nfib          | Mus musculus nuclear factor I/B (Nfib), mRNA.                                                                             | 256.5296 | 494.8703 | 1.16745E-05 |
| Lrfn3         | Mus musculus leucine rich repeat and fibronectin type III domain containing 3 (Lrfn3), mRNA.                              | 354.7355 | 177.9116 | 1.27148E-05 |
| LOC100047651  | PREDICTED: Mus musculus similar to FOG (LOC100047651), mRNA.                                                              | 1229.327 | 603.7462 | 1.31142E-05 |
| Dus1l         | Mus musculus dihydrouridine synthase 1-like (S. cerevisiae) (Dus1l), mRNA.                                                | 588.5276 | 355.998  | 1.42534E-05 |
| Dcakd         | Mus musculus dephospho-CoA kinase domain containing (Dcakd), mRNA.                                                        | 611.6596 | 382.7034 | 1.48109E-05 |

|               |                                                                                                                             |          |          |             |
|---------------|-----------------------------------------------------------------------------------------------------------------------------|----------|----------|-------------|
| BC017647      | Mus musculus cDNA sequence BC017647 (BC017647), mRNA.                                                                       | 293.5919 | 121.2544 | 1.4892E-05  |
| 6330569M22Rik | Mus musculus RIKEN cDNA 6330569M22 gene (6330569M22Rik), mRNA.                                                              | 192.6833 | 102.418  | 1.61406E-05 |
| Mupcdh        | Mus musculus mucin-like protocadherin (Mupcdh), mRNA.                                                                       | 1695.627 | 908.2817 | 1.65136E-05 |
| Pdk2          | Mus musculus pyruvate dehydrogenase kinase, isoenzyme 2 (Pdk2), mRNA.                                                       | 54.3964  | 121.6434 | 1.69421E-05 |
| AW555464      |                                                                                                                             | 279.0633 | 169.4323 | 1.72663E-05 |
| Alcam         | Mus musculus activated leukocyte cell adhesion molecule (Alcam), mRNA.                                                      | 94.44376 | 47.12383 | 1.72928E-05 |
| Impad1        | Mus musculus inositol monophosphatase domain containing 1 (Impad1), mRNA.                                                   | 123.0077 | 56.63734 | 1.7866E-05  |
| Pak4          | Mus musculus p21 (CDKN1A)-activated kinase 4 (Pak4), mRNA.                                                                  | 92.31232 | 47.01865 | 1.7806E-05  |
| Oat           | Mus musculus ornithine aminotransferase (Oat), mRNA.                                                                        | 12283.85 | 7902.006 | 1.90204E-05 |
| Acads         | Mus musculus acyl-Coenzyme A dehydrogenase, short chain (Acads), nuclear gene encoding mitochondrial protein, mRNA.         | 478.3817 | 289.8921 | 1.90752E-05 |
| Bhmt          | Mus musculus betaine-homocysteine methyltransferase (Bhmt), mRNA.                                                           | 4042.724 | 8150.879 | 2.17157E-05 |
| Atxn1         | Mus musculus ataxin 1 (Atxn1), mRNA.                                                                                        | 83.0802  | 23.66861 | 2.43558E-05 |
| Gpt1          | Mus musculus glutamic pyruvic transaminase 1, soluble (Gpt1), mRNA.                                                         | 2700.289 | 1707.059 | 2.66112E-05 |
| Npr2          | Mus musculus natriuretic peptide receptor 2 (Npr2), mRNA.                                                                   | 232.174  | 86.10828 | 2.71192E-05 |
| Sipa111       | Mus musculus signal-induced proliferation-associated 1 like 1 (Sipa111), mRNA.                                              | 145.6497 | 79.87823 | 2.79275E-05 |
| Taldo1        | Mus musculus transaldolase 1 (Taldo1), mRNA.                                                                                | 890.9734 | 569.18   | 2.82151E-05 |
| Mic2l1        |                                                                                                                             | 319.7147 | 193.3942 | 2.84435E-05 |
| Tjp2          | Mus musculus tight junction protein 2 (Tjp2), mRNA.                                                                         | 119.5445 | 60.39968 | 3.01063E-05 |
| Aars          | Mus musculus alanyl-tRNA synthetase (Aars), mRNA.                                                                           | 876.5273 | 496.138  | 3.78808E-05 |
| Gstt1         | Mus musculus glutathione S-transferase, theta 1 (Gstt1), mRNA.                                                              | 704.6835 | 428.736  | 3.99022E-05 |
| Suz12         | Mus musculus suppressor of zeste 12 homolog (Drosophila) (Suz12), mRNA.                                                     | 286.2845 | 177.2699 | 3.97359E-05 |
| Slc35b4       | Mus musculus solute carrier family 35, member B4 (Slc35b4), mRNA.                                                           | 265.8865 | 139.6605 | 3.99605E-05 |
| Rassf3        | Mus musculus Ras association (RalGDS/AF-6) domain family member 3 (Rassf3), mRNA.                                           | 474.3745 | 188.0822 | 3.9697E-05  |
| LOC100044101  | PREDICTED: Mus musculus similar to thioredoxin reductase 2 (LOC100044101), mRNA.                                            | 212.0408 | 114.0558 | 3.99941E-05 |
| Cyp4a12a      | Mus musculus cytochrome P450, family 4, subfamily a, polypeptide 12a (Cyp4a12a), mRNA.                                      | 3162.592 | 1727.768 | 4.09577E-05 |
| Zbtb17        | Mus musculus zinc finger and BTB domain containing 17 (Zbtb17), mRNA.                                                       | 88.51129 | 45.41697 | 4.32641E-05 |
| Txnrd2        |                                                                                                                             | 270.4914 | 155.1203 | 4.46827E-05 |
| Bscl2         | Mus musculus Bernardinelli-Seip congenital lipodystrophy 2 homolog (human) (Bscl2), transcript variant 2, mRNA.             | 2138.018 | 1372.934 | 4.86422E-05 |
| H2-Ke6        | Mus musculus H2-K region expressed gene 6 (H2-Ke6), mRNA.                                                                   | 1681.78  | 1095.408 | 5.28513E-05 |
| Hao           | Mus musculus 3-hydroxyanthranilate 3,4-dioxygenase (Hao), mRNA. XM_925483 XM_986039 XM_986095 XM_988905 XM_988933 XM_988974 | 1975.415 | 1288.193 | 5.25613E-05 |
| Osgin1        | Mus musculus oxidative stress induced growth inhibitor 1 (Osgin1), mRNA.                                                    | 201.3623 | 84.97999 | 5.65453E-05 |
| Apol9b        | Mus musculus apolipoprotein L 9b (Apol9b), mRNA.                                                                            | 149.4468 | 282.989  | 5.61789E-05 |

|               |                                                                                                                                  |          |          |             |
|---------------|----------------------------------------------------------------------------------------------------------------------------------|----------|----------|-------------|
| Rangap1       | Mus musculus RAN GTPase activating protein 1 (Rangap1), mRNA.                                                                    | 991.424  | 458.0478 | 6.20552E-05 |
| 5830434P21Rik | Mus musculus RIKEN cDNA 5830434P21 gene (5830434P21Rik), mRNA.                                                                   | 127.6495 | 65.89858 | 6.17225E-05 |
| Ttyh2         |                                                                                                                                  | 121.8992 | 67.08448 | 6.45676E-05 |
| Pah           | Mus musculus phenylalanine hydroxylase (Pah), mRNA.                                                                              | 2015.964 | 3967.879 | 6.54279E-05 |
| Mocs1         | Mus musculus molybdenum cofactor synthesis 1 (Mocs1), transcript variant 1, mRNA.                                                | 1555.867 | 1018.547 | 6.98883E-05 |
| Agrn          | Mus musculus agrin (Agrn), mRNA.                                                                                                 | 214.1471 | 119.0823 | 7.07579E-05 |
| Tceal8        | Mus musculus transcription elongation factor A (SII)-like 8 (Tceal8), mRNA.                                                      | 181.1463 | 330.9946 | 7.8993E-05  |
| Slc6a9        | Mus musculus solute carrier family 6 (neurotransmitter transporter, glycine), member 9 (Slc6a9), mRNA.                           | 532.1968 | 217.8698 | 8.07713E-05 |
| Dapk1         | Mus musculus death associated protein kinase 1 (Dapk1), transcript variant 2, mRNA.                                              | 39.96588 | 107.902  | 8.08704E-05 |
| Cyp27a1       | Mus musculus cytochrome P450, family 27, subfamily a, polypeptide 1 (Cyp27a1), mRNA.                                             | 3570.905 | 2314.704 | 8.17474E-05 |
| Rnf19a        | Mus musculus ring finger protein 19A (Rnf19a), mRNA.                                                                             | 541.1956 | 331.0332 | 8.14452E-05 |
| Crebl1        | Mus musculus cAMP responsive element binding protein-like 1 (Crebl1), mRNA.                                                      | 238.0013 | 131.2252 | 8.49101E-05 |
| Tubg1         | Mus musculus tubulin, gamma 1 (Tubg1), mRNA.                                                                                     | 172.4358 | 83.79004 | 9.39164E-05 |
| Ipo13         | Mus musculus importin 13 (Ipo13), mRNA.                                                                                          | 101.5298 | 56.21893 | 9.69207E-05 |
| Iyd           | Mus musculus iodotyrosine deiodinase (Iyd), mRNA.                                                                                | 489.2422 | 874.0682 | 9.63645E-05 |
| Mlxipl        | Mus musculus MLX interacting protein-like (Mlxipl), mRNA.                                                                        | 152.664  | 87.9596  | 9.85827E-05 |
| Psm13         | Mus musculus proteasome (prosome, macropain) 26S subunit, non-ATPase, 13 (Psm13), mRNA.                                          | 1638.127 | 993.0823 | 0.000103082 |
| BC011248      | Mus musculus cDNA sequence BC011248 (BC011248), mRNA.                                                                            | 96.34184 | 47.47157 | 0.000102649 |
| Bach2         | Mus musculus BTB and CNC homology 2 (Bach2), mRNA.                                                                               | 66.58665 | 19.54866 | 0.000118331 |
| Pcsk7         | Mus musculus proprotein convertase subtilisin/kexin type 7 (Pcsk7), mRNA.                                                        | 182.5512 | 111.9428 | 0.000117854 |
| 2410001C21Rik | Mus musculus RIKEN cDNA 2410001C21 gene (2410001C21Rik), mRNA.                                                                   | 490.2654 | 312.5061 | 0.000131512 |
| LOC100045300  | PREDICTED: Mus musculus similar to Dr1 associated protein 1 (negative cofactor 2 alpha) (LOC100045300), mRNA.                    | 705.3224 | 385.0708 | 0.000139578 |
| Phc2          | Mus musculus polyhomeotic-like 2 (Drosophila) (Phc2), mRNA.                                                                      | 179.714  | 104.5017 | 0.000139144 |
| Cog8          |                                                                                                                                  | 391.3651 | 208.3452 | 0.000142973 |
| Vps53         | Mus musculus vacuolar protein sorting 53 (yeast) (Vps53), mRNA.                                                                  | 405.8443 | 232.2545 | 0.00014351  |
| LOC622404     | Mus musculus hypothetical protein LOC622404 (LOC622404), mRNA.                                                                   | 795.8084 | 390.0422 | 0.000142956 |
| Ndufa10       | Mus musculus NADH dehydrogenase (ubiquinone) 1 alpha subcomplex 10 (Ndufa10), nuclear gene encoding mitochondrial protein, mRNA. | 2159.749 | 1438.709 | 0.000145825 |
| Scarf2        | Mus musculus scavenger receptor class F, member 2 (Scarf2), mRNA.                                                                | 93.71788 | 51.56102 | 0.000145129 |
| Ap1m1         | Mus musculus adaptor-related protein complex AP-1, mu subunit 1 (Ap1m1), mRNA.                                                   | 186.8185 | 109.9828 | 0.000146526 |
| AI314180      | Mus musculus expressed sequence AI314180 (AI314180), mRNA.                                                                       | 256.5299 | 162.6368 | 0.000153769 |
| Sertad2       | Mus musculus SERTA domain containing 2 (Sertad2), transcript variant 1, mRNA.                                                    | 123.5862 | 74.62383 | 0.000156858 |
| Slc22a1       | Mus musculus solute carrier family 22 (organic cation transporter), member 1 (Slc22a1), mRNA.                                    | 2515.347 | 1603.304 | 0.000156184 |

|              |                                                                                                                 |          |          |             |
|--------------|-----------------------------------------------------------------------------------------------------------------|----------|----------|-------------|
| Tbl1x        | Mus musculus transducin (beta)-like 1 X-linked (Tbl1x), mRNA.                                                   | 188.8309 | 50.09365 | 0.00015676  |
| H6pd         | Mus musculus hexose-6-phosphate dehydrogenase (glucose 1-dehydrogenase) (H6pd), mRNA.                           | 1640.539 | 786.8174 | 0.000158122 |
| Sparc        | Mus musculus secreted acidic cysteine rich glycoprotein (Sparc), mRNA.                                          | 120.4141 | 253.2519 | 0.000158231 |
| Galnt2       | Mus musculus UDP-N-acetyl-alpha-D-galactosamine:polypeptide N-acetylgalactosaminyltransferase 2 (Galnt2), mRNA. | 284.8388 | 160.5887 | 0.000160005 |
| Serpina6     | Mus musculus serine (or cysteine) peptidase inhibitor, clade A, member 6 (Serpina6), mRNA.                      | 89.9418  | 222.6064 | 0.000163858 |
| Coq10b       | Mus musculus coenzyme Q10 homolog B ( <i>S. cerevisiae</i> ) (Coq10b), transcript variant 1, mRNA.              | 254.1532 | 474.0422 | 0.000165299 |
| Ap1b1        |                                                                                                                 | 565.4904 | 338.7939 | 0.00016574  |
| Wbp2         | Mus musculus WW domain binding protein 2 (Wbp2), mRNA.                                                          | 4676.762 | 2861.306 | 0.00017336  |
| Hgfac        | Mus musculus hepatocyte growth factor activator (Hgfac), mRNA.                                                  | 2060.013 | 1378.341 | 0.000174937 |
| Rpl7a        | Mus musculus ribosomal protein L7a (Rpl7a), mRNA.                                                               | 1265.096 | 671.6839 | 0.000178762 |
| Bach1        | Mus musculus BTB and CNC homology 1 (Bach1), mRNA.                                                              | 186.9866 | 9.718855 | 0.000178577 |
| Il13ra1      | Mus musculus interleukin 13 receptor, alpha 1 (Il13ra1), mRNA.                                                  | 107.7056 | 198.6253 | 0.000183215 |
| Stxbp2       |                                                                                                                 | 445.1454 | 242.8621 | 0.000184824 |
| Ccl9         | Mus musculus chemokine (C-C motif) ligand 9 (Ccl9), mRNA.                                                       | 536.9362 | 1149.971 | 0.000194852 |
| LOC100040592 | PREDICTED: Mus musculus similar to Hmgcs1 protein, transcript variant 1 (LOC100040592), mRNA.                   | 1213.325 | 810.6735 | 0.000196293 |
| Rpn2         | Mus musculus ribophorin II (Rpn2), mRNA.                                                                        | 2239.697 | 1484.081 | 0.000202013 |
| Man2b1       | Mus musculus mannosidase 2, alpha B1 (Man2b1), mRNA.                                                            | 1148.434 | 767.7952 | 0.000207387 |
| Ldb1         | Mus musculus LIM domain binding 1 (Ldb1), transcript variant 3, mRNA.                                           | 526.423  | 283.8067 | 0.000209825 |
| Abcb4        | Mus musculus ATP-binding cassette, sub-family B (MDR/TAP), member 4 (Abcb4), mRNA.                              | 3414.474 | 2131.793 | 0.00020906  |
| Dio1         | Mus musculus deiodinase, iodothyronine, type I (Dio1), mRNA.                                                    | 703.2274 | 362.082  | 0.000211146 |
| Pelo         | Mus musculus pelota homolog ( <i>Drosophila</i> ) (Pelo), mRNA.                                                 | 473.1682 | 302.4478 | 0.000225393 |
| Map3k7ip2    | Mus musculus mitogen-activated protein kinase kinase 7 interacting protein 2 (Map3k7ip2), mRNA.                 | 341.2085 | 179.9766 | 0.000231115 |
| Abca8a       | Mus musculus ATP-binding cassette, sub-family A (ABC1), member 8a (Abca8a), mRNA.                               | 44.4993  | 92.84588 | 0.000235115 |
| Cyp2d22      | Mus musculus cytochrome P450, family 2, subfamily d, polypeptide 22 (Cyp2d22), mRNA.                            | 3408.462 | 2301.232 | 0.000235889 |
| Prox1        | Mus musculus prospero-related homeobox 1 (Prox1), mRNA.                                                         | 127.2362 | 68.07878 | 0.000238435 |
| Actr1a       | Mus musculus ARP1 actin-related protein 1 homolog A, centractin alpha (yeast) (Actr1a), mRNA.                   | 338.8082 | 221.3804 | 0.000258715 |
| AA691260     |                                                                                                                 | 62.00015 | 30.05155 | 0.000264168 |
| Abhd4        | Mus musculus abhydrolase domain containing 4 (Abhd4), mRNA.                                                     | 208.8479 | 131.3185 | 0.000275402 |
| Npepl1       | Mus musculus aminopeptidase-like 1 (Npepl1), mRNA.                                                              | 700.8592 | 316.9099 | 0.000296166 |
| Rab3d        | Mus musculus RAB3D, member RAS oncogene family (Rab3d), mRNA.                                                   | 105.8601 | 61.66028 | 0.000311951 |
| Igfbp3       | Mus musculus insulin-like growth factor binding protein 3 (Igfbp3), mRNA.                                       | 31.37334 | 92.62962 | 0.000321559 |
| Dhx38        | Mus musculus DEAH (Asp-Glu-Ala-His) box polypeptide 38 (Dhx38), mRNA.                                           | 276.0247 | 131.8502 | 0.000325709 |

|               |                                                                                                                              |          |          |             |
|---------------|------------------------------------------------------------------------------------------------------------------------------|----------|----------|-------------|
| Nap1l4        |                                                                                                                              | 526.8737 | 351.2001 | 0.000326571 |
| Nrbp2         | Mus musculus nuclear receptor binding protein 2 (Nrbp2), mRNA.                                                               | 517.6707 | 314.2047 | 0.000325142 |
| Rtn4rl1       | Mus musculus reticulon 4 receptor-like 1 (Rtn4rl1), mRNA.                                                                    | 64.44219 | 27.39625 | 0.000333894 |
| Agpat3        | Mus musculus 1-acylglycerol-3-phosphate O-acyltransferase 3 (Agpat3), mRNA.                                                  | 504.0209 | 237.6313 | 0.000335186 |
| Ces3          | Mus musculus carboxylesterase 3 (Ces3), mRNA.                                                                                | 5848.039 | 3756.207 | 0.0003375   |
| Nrg4          | Mus musculus neuregulin 4 (Nrg4), mRNA.                                                                                      | 138.5614 | 279.2283 | 0.000342927 |
| Acbd4         | Mus musculus acyl-Coenzyme A binding domain containing 4 (Acbd4), transcript variant 1, mRNA.                                | 354.6603 | 267.7023 | 0.000350669 |
| Spink3        |                                                                                                                              | 16.32471 | 57.92937 | 0.000359815 |
| Gm2a          | Mus musculus GM2 ganglioside activator protein (Gm2a), mRNA.                                                                 | 730.3018 | 1222.602 | 0.000361427 |
| 6430706D22Rik | Mus musculus RIKEN cDNA 6430706D22 gene (6430706D22Rik), mRNA.                                                               | 287.3678 | 184.781  | 0.000369585 |
| LOC100043671  | PREDICTED: Mus musculus hypothetical protein LOC100043671 (LOC100043671), mRNA.                                              | 290.6667 | 178.3743 | 0.000373947 |
| Hsd17b10      | Mus musculus hydroxysteroid (17-beta) dehydrogenase 10 (Hsd17b10), nuclear gene encoding mitochondrial protein, mRNA.        | 6048.781 | 3792.282 | 0.000388136 |
| BC037034      | Mus musculus cDNA sequence BC037034 (BC037034), mRNA.                                                                        | 125.0144 | 69.6563  | 0.000413792 |
| Sap30l        | Mus musculus SAP30-like (Sap30l), mRNA.                                                                                      | 559.2783 | 359.4932 | 0.000443942 |
| Xpnpep3       | Mus musculus X-prolyl aminopeptidase (aminopeptidase P) 3, putative (Xpnpep3), mRNA.                                         | 197.266  | 124.2697 | 0.000452089 |
| Tdo2          | Mus musculus tryptophan 2,3-dioxygenase (Tdo2), mRNA.                                                                        | 977.0133 | 1837.313 | 0.000472855 |
| Fam125a       | Mus musculus family with sequence similarity 125, member A (Fam125a), mRNA.                                                  | 619.9188 | 402.0097 | 0.000491135 |
| Clstn3        | Mus musculus calyntenin 3 (Clstn3), mRNA.                                                                                    | 87.85159 | 24.64337 | 0.000518432 |
| Slco1b2       | Mus musculus solute carrier organic anion transporter family, member 1b2 (Slco1b2), transcript variant 1, mRNA.              | 2337.041 | 1260.203 | 0.000547936 |
| Cyp7a1        | Mus musculus cytochrome P450, family 7, subfamily a, polypeptide 1 (Cyp7a1), mRNA.                                           | 580.7599 | 1370.533 | 0.000548761 |
| 2010011I20Rik | Mus musculus RIKEN cDNA 2010011I20 gene (2010011I20Rik), mRNA.                                                               | 557.3078 | 376.515  | 0.00055005  |
| Hspd1         | Mus musculus heat shock protein 1 (chaperonin) (Hspd1), mRNA.                                                                | 1752.368 | 2343.381 | 0.00058183  |
| Copa          | Mus musculus coatamer protein complex subunit alpha (Copa), mRNA.                                                            | 535.8927 | 297.1369 | 0.000583896 |
| Got2          | Mus musculus glutamate oxaloacetate transaminase 2, mitochondrial (Got2), nuclear gene encoding mitochondrial protein, mRNA. | 7019.312 | 4710.295 | 0.000588086 |
| Elov3         | Mus musculus elongation of very long chain fatty acids (FEN1/Elo2, SUR4/Elo3, yeast)-like 3 (Elov3), mRNA.                   | 145.9671 | 20.45714 | 0.000596554 |
| Lpl           | Mus musculus lipoprotein lipase (Lpl), mRNA.                                                                                 | 142.5927 | 333.3284 | 0.000596625 |
| Ranbp9        | Mus musculus RAN binding protein 9 (Ranbp9), mRNA.                                                                           | 118.0863 | 204.6474 | 0.000604675 |
| Pgls          | Mus musculus 6-phosphogluconolactonase (Pgls), mRNA.                                                                         | 722.5506 | 456.0654 | 0.000604059 |
| Med26         | Mus musculus mediator complex subunit 26 (Med26), mRNA.                                                                      | 85.30645 | 42.90229 | 0.000626271 |
| Llg12         | Mus musculus lethal giant larvae homolog 2 (Drosophila) (Llg12), mRNA.                                                       | 558.6888 | 323.2649 | 0.00062887  |
| Pygo2         |                                                                                                                              | 253.1661 | 166.8847 | 0.000661576 |
| Glyctk        | Mus musculus glycerate kinase (Glyctk), transcript variant 2, mRNA.                                                          | 277.4188 | 132.756  | 0.000667987 |

|               |                                                                                                                            |          |          |             |
|---------------|----------------------------------------------------------------------------------------------------------------------------|----------|----------|-------------|
| Gamt          | Mus musculus guanidinoacetate methyltransferase (Gamt), mRNA.                                                              | 199.1662 | 122.0873 | 0.000677166 |
| Plvap         | Mus musculus plasmalemma vesicle associated protein (Plvap), mRNA.                                                         | 439.0174 | 244.9799 | 0.000735898 |
| LOC100045617  | PREDICTED: Mus musculus similar to Eukaryotic translation initiation factor 4A2 (LOC100045617), mRNA.                      | 1004.977 | 1777.913 | 0.000743755 |
| Preb          |                                                                                                                            | 595.8427 | 348.4122 | 0.000781122 |
| Twistnb       | Mus musculus TWIST neighbor (Twistnb), mRNA.                                                                               | 128.6391 | 53.6092  | 0.000778219 |
| Aplp2         | Mus musculus amyloid beta (A4) precursor-like protein 2 (Aplp2), transcript variant 3, mRNA.                               | 1626.605 | 1014.315 | 0.000799268 |
| Hmgcs2        | Mus musculus 3-hydroxy-3-methylglutaryl-Coenzyme A synthase 2 (Hmgcs2), nuclear gene encoding mitochondrial protein, mRNA. | 11966.5  | 7504.537 | 0.000804255 |
| 1810008A18Rik | Mus musculus RIKEN cDNA 1810008A18 gene (1810008A18Rik), mRNA.                                                             | 143.2306 | 73.96152 | 0.000828359 |
| Zfp326        | Mus musculus zinc finger protein 326 (Zfp326), mRNA.                                                                       | 76.17352 | 55.03831 | 0.000877247 |
| Hrg           | Mus musculus histidine-rich glycoprotein (Hrg), mRNA.                                                                      | 637.9526 | 788.2064 | 0.000879066 |
| Zfp574        | Mus musculus zinc finger protein 574 (Zfp574), mRNA.                                                                       | 217.9144 | 143.3615 | 0.000876408 |
| Dnajc5        | Mus musculus DnaJ (Hsp40) homolog, subfamily C, member 5 (Dnajc5), mRNA.                                                   | 322.3782 | 135.1539 | 0.00087822  |
| Surf4         | Mus musculus surfet gene 4 (Surf4), mRNA.                                                                                  | 893.6344 | 586.7164 | 0.000887967 |
| Cap1          | Mus musculus CAP, adenylate cyclase-associated protein 1 (yeast) (Cap1), mRNA.                                             | 135.5731 | 78.25021 | 0.000889631 |
| Spsb3         | Mus musculus spltA/ryanodine receptor domain and SOCS box containing 3 (Spsb3), mRNA.                                      | 172.4475 | 105.7656 | 0.000905679 |
| Rab11fip3     | PREDICTED: Mus musculus RAB11 family interacting protein 3 (class II), transcript variant 1 (Rab11fip3), mRNA.             | 61.99015 | 32.06471 | 0.000919174 |
| Sgk1          | Mus musculus serum/glucocorticoid regulated kinase 1 (Sgk1), mRNA.                                                         | 567.3633 | 990.5826 | 0.000953644 |
| Sirt7         | Mus musculus sirtuin 7 (silent mating type information regulation 2, homolog) 7 (S. cerevisiae) (Sirt7), mRNA.             | 671.6667 | 441.6028 | 0.000961489 |
| Cd47          | Mus musculus CD47 antigen (Rh-related antigen, integrin-associated signal transducer) (Cd47), mRNA.                        | 325.3198 | 526.6346 | 0.000964703 |
| Psm4          | Mus musculus proteasome (prosome, macropain) 26S subunit, non-ATPase, 4 (Psm4), mRNA.                                      | 3870.33  | 2309.117 | 0.000987326 |
| Zdhhc21       | Mus musculus zinc finger, DHHC domain containing 21 (Zdhhc21), mRNA.                                                       | 78.60256 | 37.26717 | 0.000998423 |
| Unc84b        | Mus musculus unc-84 homolog B (C. elegans) (Unc84b), mRNA.                                                                 | 776.2504 | 519.4681 | 0.000996643 |
| Rad23b        | Mus musculus RAD23b homolog (S. cerevisiae) (Rad23b), mRNA.                                                                | 382.6131 | 714.139  | 0.000998339 |
| Glul          | Mus musculus glutamate-ammonia ligase (glutamine synthetase) (Glul), mRNA.                                                 | 81.81469 | 36.5432  | 0.001062175 |
| LOC329575     | Mus musculus hypothetical LOC329575 (LOC329575), mRNA.                                                                     | 71.75904 | 115.7045 | 0.001066583 |
| Cyp8b1        | Mus musculus cytochrome P450, family 8, subfamily b, polypeptide 1 (Cyp8b1), mRNA.                                         | 10675.54 | 6093.336 | 0.001086333 |
| Trfp          | Mus musculus Trf (TATA binding protein-related factor)-proximal protein homolog (Drosophila) (Trfp), mRNA.                 | 113.1445 | 69.77468 | 0.001110148 |
| Ube2a         | Mus musculus ubiquitin-conjugating enzyme E2A, RAD6 homolog (S. cerevisiae) (Ube2a), mRNA.                                 | 75.43704 | 133.4253 | 0.001124331 |
| Upp2          | Mus musculus uridine phosphorylase 2 (Upp2), mRNA.                                                                         | 551.7503 | 1420.911 | 0.001131197 |
| Nfatc3        | Mus musculus nuclear factor of activated T-cells, cytoplasmic, calcineurin-dependent 3 (Nfatc3), mRNA.                     | 62.45937 | 16.71325 | 0.001143656 |
| Amy1          | Mus musculus amylase 1, salivary (Amy1), mRNA.                                                                             | 811.5696 | 1285.048 | 0.001155691 |
| Ddx24         | Mus musculus DEAD (Asp-Glu-Ala-Asp) box polypeptide 24 (Ddx24), mRNA.                                                      | 206.9297 | 126.0333 | 0.001175397 |



|               |                                                                                                                                      |          |          |             |
|---------------|--------------------------------------------------------------------------------------------------------------------------------------|----------|----------|-------------|
| 6430510M02Rik | Mus musculus RIKEN cDNA 6430510M02 gene (6430510M02Rik), mRNA.                                                                       | 56.29433 | 8.263918 | 0.001176191 |
| Nedd4l        | Mus musculus neural precursor cell expressed, developmentally down-regulated gene 4-like (Nedd4l), mRNA.                             | 340.5531 | 200.3115 | 0.001212964 |
| Isca1         | Mus musculus iron-sulfur cluster assembly 1 homolog ( <i>S. cerevisiae</i> ) (Isca1), mRNA.                                          | 613.9527 | 972.6906 | 0.001229015 |
| Cpb2          | Mus musculus carboxypeptidase B2 (plasma) (Cpb2), mRNA.                                                                              | 1434.951 | 2185.418 | 0.001229904 |
| Tmem120a      | Mus musculus transmembrane protein 120A (Tmem120a), mRNA.                                                                            | 1635.472 | 1133.903 | 0.00123813  |
| Mrpl28        | Mus musculus mitochondrial ribosomal protein L28 (Mrpl28), nuclear gene encoding mitochondrial protein, mRNA.                        | 934.9156 | 650.2766 | 0.001252471 |
| 2600009E05Rik | Mus musculus RIKEN cDNA 2600009E05 gene (2600009E05Rik), mRNA. XM_925578 XM_925581 XM_925583 XM_994018 XM_994040 XM_994059 XM_994077 | 1989.488 | 1392.449 | 0.001264904 |
| Junb          | Mus musculus Jun-B oncogene (Junb), mRNA.                                                                                            | 78.5924  | 159.7169 | 0.001310671 |
| Obfc2b        | Mus musculus oligonucleotide/oligosaccharide-binding fold containing 2B (Obfc2b), mRNA.                                              | 86.68397 | 153.0718 | 0.001341977 |
| Itfg3         | Mus musculus integrin alpha FG-GAP repeat containing 3 (Itfg3), mRNA.                                                                | 285.5638 | 193.2421 | 0.00135394  |
| Afg3l1        | Mus musculus AFG3(ATPase family gene 3)-like 1 (yeast) (Afg3l1), mRNA.                                                               | 186.2856 | 128.9113 | 0.001372764 |
| Ube2e2        | Mus musculus ubiquitin-conjugating enzyme E2E 2 (UBC4/5 homolog, yeast) (Ube2e2), mRNA.                                              | 690.577  | 424.1216 | 0.001378819 |
| Grina         | Mus musculus glutamate receptor, ionotropic, N-methyl D-aspartate-associated protein 1 (glutamate binding) (Grina), mRNA.            | 4724.663 | 2993.987 | 0.001386321 |
| Snx33         | Mus musculus sorting nexin 33 (Snx33), mRNA.                                                                                         | 57.73578 | 27.80314 | 0.001386552 |
| C6            | Mus musculus complement component 6 (C6), mRNA.                                                                                      | 806.1717 | 401.1668 | 0.001396142 |
| Polrmt        | Mus musculus polymerase (RNA) mitochondrial (DNA directed) (Polrmt), nuclear gene encoding mitochondrial protein, mRNA.              | 356.1396 | 218.5574 | 0.001492121 |
| Acd           | Mus musculus adrenocortical dysplasia (Acd), mRNA.                                                                                   | 364.4929 | 236.1465 | 0.001496311 |
| Camta2        | Mus musculus calmodulin binding transcription activator 2 (Camta2), mRNA.                                                            | 283.0722 | 142.9754 | 0.001517109 |
| Zkscan14      | Mus musculus zinc finger with KRAB and SCAN domains 14 (Zkscan14), mRNA.                                                             | 174.1654 | 108.0061 | 0.001518303 |
| Slc35b2       | Mus musculus solute carrier family 35, member B2 (Slc35b2), mRNA.                                                                    | 494.9284 | 328.2853 | 0.001536016 |
| Josd3         | Mus musculus Josephin domain containing 3 (Josd3), transcript variant 3, mRNA.                                                       | 57.85014 | 109.6241 | 0.001571881 |
| Cox19         | Mus musculus COX19 cytochrome c oxidase assembly homolog ( <i>S. cerevisiae</i> ) (Cox19), mRNA.                                     | 539.6766 | 374.3612 | 0.001578219 |
| Zfyve1        | Mus musculus zinc finger, FYVE domain containing 1 (Zfyve1), mRNA.                                                                   | 61.12157 | 112.6674 | 0.001573572 |
| Rcor1         | Mus musculus REST corepressor 1 (Rcor1), mRNA.                                                                                       | 72.28275 | 14.40165 | 0.001574161 |
| Syvn1         | Mus musculus synovial apoptosis inhibitor 1, synoviolin (Syvn1), mRNA.                                                               | 1491.219 | 899.5104 | 0.001577395 |
| Fbxw5         | Mus musculus F-box and WD-40 domain protein 5 (Fbxw5), mRNA.                                                                         | 620.6775 | 305.5162 | 0.001577474 |
| Dcun1d4       | Mus musculus DCN1, defective in cullin neddylation 1, domain containing 4 ( <i>S. cerevisiae</i> ) (Dcun1d4), mRNA.                  | 223.4084 | 136.8326 | 0.001581194 |
| Ptpn1         | Mus musculus protein tyrosine phosphatase, non-receptor type 1 (Ptpn1), mRNA.                                                        | 101.5741 | 36.82352 | 0.001623404 |
| Igfbp2        | Mus musculus insulin-like growth factor binding protein 2 (Igfbp2), mRNA.                                                            | 1669.06  | 2643.782 | 0.001625221 |

|               |                                                                                                                        |          |          |             |
|---------------|------------------------------------------------------------------------------------------------------------------------|----------|----------|-------------|
| Lsm12         | Mus musculus LSM12 homolog ( <i>S. cerevisiae</i> ) (Lsm12), mRNA.                                                     | 52.53571 | 18.38375 | 0.001630969 |
| P4hb          | Mus musculus prolyl 4-hydroxylase, beta polypeptide (P4hb), mRNA.                                                      | 5803.644 | 4104.593 | 0.001658162 |
| Arl6          | Mus musculus ADP-ribosylation factor-like 6 (Arl6), mRNA.                                                              | 29.39556 | 62.36684 | 0.001663369 |
| Cyp2d10       | Mus musculus cytochrome P450, family 2, subfamily d, polypeptide 10 (Cyp2d10), mRNA.                                   | 6995.922 | 4950.286 | 0.001664522 |
| Parva         | Mus musculus parvin, alpha (Parva), mRNA.                                                                              | 402.1085 | 257.7439 | 0.001666497 |
| Rin3          | Mus musculus Ras and Rab interactor 3 (Rin3), mRNA.                                                                    | 126.1301 | 64.07538 | 0.001666816 |
| Lypla2        | Mus musculus lysophospholipase 2 (Lypla2), mRNA.                                                                       | 2695.602 | 1735.999 | 0.001720394 |
| Supt3h        | Mus musculus suppressor of Ty 3 homolog ( <i>S. cerevisiae</i> ) (Supt3h), mRNA.                                       | 184.217  | 105.0901 | 0.001727934 |
| Paqr7         | Mus musculus progesterin and adipoQ receptor family member VII (Paqr7), mRNA.                                          | 285.5976 | 194.9888 | 0.001805737 |
| Araf          | Mus musculus v-raf murine sarcoma 3611 viral oncogene homolog (Araf), mRNA.                                            | 567.2512 | 376.1053 | 0.001853668 |
| Krcc1         | Mus musculus lysine-rich coiled-coil 1 (Krcc1), mRNA.                                                                  | 265.0557 | 419.6159 | 0.001850057 |
| D030028O16Rik |                                                                                                                        | 117.1549 | 74.14735 | 0.001877575 |
| Ppp4c         | Mus musculus protein phosphatase 4, catalytic subunit (Ppp4c), mRNA.                                                   | 413.8517 | 253.4542 | 0.001896009 |
| Usp20         | Mus musculus ubiquitin specific peptidase 20 (Usp20), mRNA.                                                            | 100.7868 | 56.47852 | 0.001900393 |
| Eif2s3x       | Mus musculus eukaryotic translation initiation factor 2, subunit 3, structural gene X-linked (Eif2s3x), mRNA.          | 310.9085 | 515.3203 | 0.001935638 |
| Anapc7        | Mus musculus anaphase promoting complex subunit 7 (Anapc7), mRNA.                                                      | 138.3188 | 74.59426 | 0.001935783 |
| Man1a         | Mus musculus mannosidase 1, alpha (Man1a), mRNA.                                                                       | 77.28661 | 132.666  | 0.001934501 |
| Fam169b       | Mus musculus family with sequence similarity 169, member B (Fam169b), mRNA.                                            | 220.9469 | 149.2549 | 0.001994408 |
| Rhbdl2        | Mus musculus rhomboid, veinlet-like 2 ( <i>Drosophila</i> ) (Rhbdl2), mRNA.                                            | 131.7204 | 84.92447 | 0.001989939 |
| Arl8a         | Mus musculus ADP-ribosylation factor-like 8A (Arl8a), mRNA.                                                            | 415.655  | 285.9274 | 0.002033874 |
| Rnpep         | Mus musculus arginyl aminopeptidase (aminopeptidase B) (Rnpep), mRNA.                                                  | 136.6379 | 87.53481 | 0.002039005 |
| 4930455C21Rik | Mus musculus RIKEN cDNA 4930455C21 gene (4930455C21Rik), mRNA.                                                         | 111.551  | 62.84002 | 0.002117263 |
| Ssfa2         |                                                                                                                        | 269.5585 | 423.6205 | 0.002176933 |
| Bik           | Mus musculus BCL2-interacting killer (Bik), mRNA.                                                                      | 115.4406 | 55.78039 | 0.002174037 |
| Sod3          | Mus musculus superoxide dismutase 3, extracellular (Sod3), mRNA.                                                       | 18.58619 | 52.42021 | 0.002172937 |
| Mmd2          | Mus musculus monocyte to macrophage differentiation-associated 2 (Mmd2), mRNA.                                         | 66.89585 | 401.5877 | 0.002197495 |
| 2310003H01Rik | Mus musculus RIKEN cDNA 2310003H01 gene (2310003H01Rik), mRNA.                                                         | 68.30159 | 25.12927 | 0.002217166 |
| D030070L09Rik | Mus musculus RIKEN cDNA D030070L09 gene (D030070L09Rik), mRNA.                                                         | 58.12776 | 103.2093 | 0.002266684 |
| Stt3b         | Mus musculus STT3, subunit of the oligosaccharyltransferase complex, homolog B ( <i>S. cerevisiae</i> ) (Stt3b), mRNA. | 1908.515 | 1258.08  | 0.0022603   |
| Nup62         | Mus musculus nucleoporin 62 (Nup62), mRNA.                                                                             | 200.6912 | 135.3232 | 0.002301762 |
| 4930504E06Rik | Mus musculus RIKEN cDNA 4930504E06 gene (4930504E06Rik), mRNA.                                                         | 760.829  | 495.487  | 0.002386461 |
| Keg1          | Mus musculus kidney expressed gene 1 (Keg1), mRNA.                                                                     | 743.4583 | 1143.042 | 0.002440554 |
| Myd88         | Mus musculus myeloid differentiation primary response gene 88 (Myd88), mRNA.                                           | 562.2405 | 382.3313 | 0.002440866 |

|               |                                                                                                              |          |          |             |
|---------------|--------------------------------------------------------------------------------------------------------------|----------|----------|-------------|
| Igsf4a        |                                                                                                              | 81.18259 | 161.0031 | 0.002493863 |
| LOC100048645  | PREDICTED: Mus musculus similar to cysteine and glycine-rich protein 2 binding protein (LOC100048645), mRNA. | 217.6488 | 147.95   | 0.002528498 |
| 2610016F04Rik |                                                                                                              | 32.80118 | 69.30591 | 0.002538714 |
| Calm2         | Mus musculus calmodulin 2 (Calm2), mRNA.                                                                     | 392.8505 | 638.2979 | 0.002546836 |
| Smn1          | Mus musculus survival motor neuron 1 (Smn1), mRNA.                                                           | 197.4669 | 133.4282 | 0.002550079 |
| Neu2          | Mus musculus neuraminidase 2 (Neu2), mRNA.                                                                   | 105.0909 | 66.21532 | 0.002616888 |
| Ctsl          | Mus musculus cathepsin L (Ctsl), mRNA.                                                                       | 29.89993 | 64.98996 | 0.002653951 |
| Cygb          | Mus musculus cytoglobin (Cygb), mRNA.                                                                        | 82.87439 | 20.70916 | 0.002672648 |
| Cyp7b1        | Mus musculus cytochrome P450, family 7, subfamily b, polypeptide 1 (Cyp7b1), mRNA.                           | 3197.62  | 1185.057 | 0.002712356 |
| Tmem176a      | Mus musculus transmembrane protein 176A (Tmem176a), mRNA.                                                    | 85.13457 | 178.5456 | 0.002710289 |
| 9130422G05Rik |                                                                                                              | 60.89148 | 21.65907 | 0.002752578 |
| Rnf214        | Mus musculus ring finger protein 214 (Rnf214), mRNA.                                                         | 79.15855 | 45.65288 | 0.002782701 |
| Tnfrsf11b     | Mus musculus tumor necrosis factor receptor superfamily, member 11b (osteoprotegerin) (Tnfrsf11b), mRNA.     | 23.60503 | 52.32326 | 0.002814327 |
| Lrrc28        | Mus musculus leucine rich repeat containing 28 (Lrrc28), mRNA.                                               | 181.2848 | 121.4686 | 0.002979198 |
| Ubp2          | Mus musculus ubiquitin-associated protein 2 (Ubp2), mRNA.                                                    | 119.8243 | 77.40273 | 0.002972693 |
| Ube3b         | Mus musculus ubiquitin protein ligase E3B (Ube3b), mRNA.                                                     | 288.0252 | 200.3994 | 0.002965574 |
| 2610528O22Rik |                                                                                                              | 434.9066 | 305.9987 | 0.003128926 |
| Smg7          | Mus musculus Smg-7 homolog, nonsense mediated mRNA decay factor (C. elegans) (Smg7), mRNA.                   | 155.6101 | 246.2591 | 0.003138995 |
| BC002199      | Mus musculus cDNA sequence BC002199 (BC002199), mRNA.                                                        | 372.6629 | 261.1634 | 0.003159002 |
| Eef1e1        | Mus musculus eukaryotic translation elongation factor 1 epsilon 1 (Eef1e1), mRNA.                            | 153.8008 | 243.3809 | 0.003183148 |
| Uap1          | Mus musculus UDP-N-acetylglucosamine pyrophosphorylase 1 (Uap1), mRNA.                                       | 257.4059 | 428.5027 | 0.003175306 |
| 9030625A04Rik | Mus musculus RIKEN cDNA 9030625A04 gene (9030625A04Rik), mRNA.                                               | 22.54148 | 61.70602 | 0.003206817 |
| Lgals9        | Mus musculus lectin, galactose binding, soluble 9 (Lgals9), mRNA.                                            | 996.5493 | 1679.327 | 0.00319937  |
| A630042L21Rik | Mus musculus RIKEN cDNA A630042L21 gene (A630042L21Rik), transcript variant 2, mRNA.                         | 175.6147 | 104.1238 | 0.003237587 |
| Leng9         | Mus musculus leukocyte receptor cluster (LRC) member 9 (Leng9), mRNA.                                        | 114.0946 | 59.52784 | 0.003303126 |
| Sil1          | Mus musculus endoplasmic reticulum chaperone SIL1 homolog (S. cerevisiae) (Sil1), mRNA.                      | 152.059  | 98.61333 | 0.003338824 |
| Olfml1        | Mus musculus olfactomedin-like 1 (Olfml1), mRNA.                                                             | 114.5031 | 52.32788 | 0.00337649  |
| Map2k3        | Mus musculus mitogen activated protein kinase kinase 3 (Map2k3), mRNA.                                       | 1004.142 | 695.0297 | 0.003373456 |
| Tmem5         | Mus musculus transmembrane protein 5 (Tmem5), mRNA.                                                          | 176.9142 | 276.9654 | 0.00342753  |
| Ddx6          | Mus musculus DEAD (Asp-Glu-Ala-Asp) box polypeptide 6 (Ddx6), mRNA.                                          | 69.77277 | 6.96557  | 0.003493785 |
| AI662250      | Mus musculus expressed sequence AI662250 (AI662250), mRNA.                                                   | 103.3068 | 167.6964 | 0.003546823 |
| Mrc1          | Mus musculus mannose receptor, C type 1 (Mrc1), mRNA.                                                        | 206.3023 | 347.962  | 0.003548203 |
| LOC100041103  | PREDICTED: Mus musculus hypothetical protein LOC100041103 (LOC100041103), mRNA.                              | 172.3273 | 108.2588 | 0.003617145 |

|               |                                                                                                                                                                      |          |          |             |
|---------------|----------------------------------------------------------------------------------------------------------------------------------------------------------------------|----------|----------|-------------|
| Mbl2          | Mus musculus mannose-binding lectin (protein C) 2 (Mbl2), mRNA.                                                                                                      | 774.3063 | 1305.257 | 0.003659889 |
| 2810008M24Rik | Mus musculus RIKEN cDNA 2810008M24 gene (2810008M24Rik), mRNA.                                                                                                       | 92.1517  | 150.3915 | 0.003762056 |
| Zc3h18        | Mus musculus zinc finger CCCH-type containing 18 (Zc3h18), transcript variant 1, mRNA.                                                                               | 199.1665 | 76.41446 | 0.003769695 |
| Susd4         | Mus musculus sushi domain containing 4 (Susd4), mRNA.                                                                                                                | 93.74682 | 13.48098 | 0.003774771 |
| Pnpla2        | Mus musculus patatin-like phospholipase domain containing 2 (Pnpla2), mRNA.                                                                                          | 2085.491 | 1444.435 | 0.003792306 |
| Lrp11         | Mus musculus low density lipoprotein receptor-related protein 11 (Lrp11), mRNA.                                                                                      | 28.08669 | 57.51269 | 0.003945641 |
| AI450540      | Mus musculus expressed sequence AI450540 (AI450540), mRNA.                                                                                                           | 480.6727 | 314.2859 | 0.003966917 |
| Mbc2          | Mus musculus membrane bound C2 domain containing protein (Mbc2), mRNA.                                                                                               | 52.49826 | 26.47579 | 0.004170307 |
| Lzts2         | Mus musculus leucine zipper, putative tumor suppressor 2 (Lzts2), mRNA.                                                                                              | 67.47784 | 34.37949 | 0.004177336 |
| BC006779      | Mus musculus cDNA sequence BC006779 (BC006779), mRNA.<br>XM_001001098 XM_001003843 XM_001003848 XM_001003853<br>XM_001003857 XM_994341 XM_994355 XM_994381 XM_994398 | 140.4444 | 103.8732 | 0.00416879  |
| Ppap2b        | Mus musculus phosphatidic acid phosphatase type 2B (Ppap2b), mRNA.                                                                                                   | 1114.861 | 655.2534 | 0.004164769 |
| Vsig4         | Mus musculus V-set and immunoglobulin domain containing 4 (Vsig4), mRNA.                                                                                             | 308.0905 | 482.611  | 0.004189423 |
| Tsen34        | Mus musculus tRNA splicing endonuclease 34 homolog (S. cerevisiae) (Tsen34), mRNA.                                                                                   | 195.931  | 134.461  | 0.004199037 |
| Gsk3b         | Mus musculus glycogen synthase kinase 3 beta (Gsk3b), mRNA.                                                                                                          | 68.01453 | 36.00225 | 0.004357692 |
| Ywhag         | Mus musculus tyrosine 3-monooxygenase/tryptophan 5-monooxygenase activation protein, gamma polypeptide (Ywhag), mRNA.                                                | 870.0189 | 562.9316 | 0.004393307 |
| Rfc2          | Mus musculus replication factor C (activator 1) 2 (Rfc2), mRNA.                                                                                                      | 298.951  | 206.2162 | 0.004446628 |
| AV028368      |                                                                                                                                                                      | 90.06511 | 52.70071 | 0.004474528 |
| Vps28         | Mus musculus vacuolar protein sorting 28 (yeast) (Vps28), mRNA.                                                                                                      | 2237.783 | 1542.958 | 0.004508861 |
| Taf10         | Mus musculus TAF10 RNA polymerase II, TATA box binding protein (TBP)-associated factor (Taf10), mRNA.                                                                | 622.67   | 402.636  | 0.0045097   |
| Prpf6         | Mus musculus PRP6 pre-mRNA splicing factor 6 homolog (yeast) (Prpf6), mRNA.                                                                                          | 230.4756 | 160.1338 | 0.004538722 |
| Sh3bp5l       | Mus musculus SH3 binding domain protein 5 like (Sh3bp5l), mRNA.                                                                                                      | 281.1843 | 197.2561 | 0.004552204 |
| A230050P20Rik | Mus musculus RIKEN cDNA A230050P20 gene (A230050P20Rik), mRNA.                                                                                                       | 243.0033 | 149.0322 | 0.004552175 |
| Cd300lg       | Mus musculus CD300 antigen like family member G (Cd300lg), mRNA.                                                                                                     | 83.71037 | 154.5896 | 0.004574307 |
| Siah2         | Mus musculus seven in absentia 2 (Siah2), mRNA.                                                                                                                      | 54.94883 | 29.76498 | 0.004571521 |
| C4b           | Mus musculus complement component 4B (Childo blood group) (C4b), mRNA. XM_921663 XM_921673 XM_921676 XM_921678                                                       | 3168.396 | 1658.636 | 0.0047295   |
| LOC216443     |                                                                                                                                                                      | 371.1507 | 263.273  | 0.004733657 |
| Ap2a2         | Mus musculus adaptor protein complex AP-2, alpha 2 subunit (Ap2a2), mRNA.                                                                                            | 210.8018 | 146.0478 | 0.004855728 |
| Acaa1a        | Mus musculus acetyl-Coenzyme A acyltransferase 1A (Acaa1a), mRNA.                                                                                                    | 6283.381 | 4572.553 | 0.004860791 |
| Fkbp4         | Mus musculus FK506 binding protein 4 (Fkbp4), mRNA.                                                                                                                  | 1146.674 | 807.8047 | 0.004880447 |
| Calm3         | Mus musculus calmodulin 3 (Calm3), mRNA.                                                                                                                             | 397.892  | 283.1253 | 0.004915087 |

|               |                                                                                                                                 |          |          |             |
|---------------|---------------------------------------------------------------------------------------------------------------------------------|----------|----------|-------------|
| Dedd2         | Mus musculus death effector domain-containing DNA binding protein 2 (Dedd2), mRNA.                                              | 448.2929 | 318.0133 | 0.00514099  |
| Atp6v0a2      | Mus musculus ATPase, H+ transporting, lysosomal V0 subunit A2 (Atp6v0a2), mRNA.                                                 | 174.0262 | 83.64155 | 0.005213236 |
| Efr3a         | Mus musculus EFR3 homolog A ( <i>S. cerevisiae</i> ) (Efr3a), mRNA.                                                             | 41.35077 | 75.10959 | 0.005203084 |
| Arsa          | Mus musculus arylsulfatase A (Arsa), mRNA.                                                                                      | 319.1725 | 213.0761 | 0.005204994 |
| LOC100044322  | PREDICTED: Mus musculus similar to UDP-glucose ceramide glucosyltransferase-like 1 (LOC100044322), mRNA.                        | 251.5721 | 176.5029 | 0.005362405 |
| Dnajb2        | Mus musculus DnaJ (Hsp40) homolog, subfamily B, member 2 (Dnajb2), transcript variant 2, mRNA.                                  | 312.8401 | 173.7239 | 0.005418759 |
| Snx11         | Mus musculus sorting nexin 11 (Snx11), mRNA.                                                                                    | 169.2844 | 93.93732 | 0.005412825 |
| Nup210        | Mus musculus nucleoporin 210 (Nup210), mRNA.                                                                                    | 165.2409 | 75.98884 | 0.005442369 |
| Myo9b         | Mus musculus myosin IXb (Myo9b), mRNA.                                                                                          | 74.20939 | 44.77792 | 0.005430112 |
| Hexb          | Mus musculus hexosaminidase B (Hexb), mRNA.                                                                                     | 44.72835 | 95.11771 | 0.005425522 |
| Sec16a        | Mus musculus SEC16 homolog A ( <i>S. cerevisiae</i> ) (Sec16a), mRNA.                                                           | 402.9029 | 249.6567 | 0.005531348 |
| Rhbdf1        | Mus musculus rhomboid family 1 ( <i>Drosophila</i> ) (Rhbdf1), mRNA.                                                            | 93.05595 | 48.90557 | 0.005612022 |
| Hspa8         | Mus musculus heat shock protein 8 (Hspa8), mRNA.                                                                                | 2104.122 | 3270.755 | 0.005681794 |
| LOC100046802  | PREDICTED: Mus musculus similar to Inhbb protein (LOC100046802), mRNA.                                                          | 63.68973 | 36.94936 | 0.005674824 |
| Carkd         | Mus musculus carbohydrate kinase domain containing (Carkd), mRNA.                                                               | 677.3617 | 472.1576 | 0.005673017 |
| Uso1          | Mus musculus USO1 homolog, vesicle docking protein (yeast) (Uso1), mRNA.                                                        | 250.9889 | 166.0893 | 0.005717215 |
| Cdk9          | Mus musculus cyclin-dependent kinase 9 (CDC2-related kinase) (Cdk9), mRNA.                                                      | 40.08628 | 74.29592 | 0.005993406 |
| LOC100044172  | PREDICTED: Mus musculus hypothetical protein LOC100044172 (LOC100044172), mRNA.                                                 | 116.61   | 63.68958 | 0.006148364 |
| Adss          | Mus musculus adenylosuccinate synthetase, non muscle (Adss), mRNA.                                                              | 66.3874  | 119.9037 | 0.006189794 |
| Dhdh          | Mus musculus dihydrodiol dehydrogenase (dimeric) (Dhdh), mRNA.                                                                  | 309.6404 | 110.7901 | 0.006180997 |
| A230051G13Rik |                                                                                                                                 | 177.9854 | 122.9346 | 0.006174425 |
| M6prbp1       | Mus musculus mannose-6-phosphate receptor binding protein 1 (M6prbp1), mRNA.                                                    | 144.7506 | 74.61866 | 0.006250996 |
| S3-12         | Mus musculus plasma membrane associated protein, S3-12 (S3-12), mRNA.                                                           | 87.30055 | 50.35309 | 0.006364592 |
| 3110056O03Rik | Mus musculus RIKEN cDNA 3110056O03 gene (3110056O03Rik), mRNA.                                                                  | 152.5531 | 89.5111  | 0.006419978 |
| Smarcd2       | Mus musculus SWI/SNF related, matrix associated, actin dependent regulator of chromatin, subfamily d, member 2 (Smarcd2), mRNA. | 541.3276 | 322.903  | 0.006550903 |
| Creb3         | Mus musculus cAMP responsive element binding protein 3 (Creb3), mRNA.                                                           | 446.2529 | 321.3033 | 0.006659635 |
| Sh3glb2       | Mus musculus SH3-domain GRB2-like endophilin B2 (Sh3glb2), mRNA.                                                                | 122.8734 | 77.89943 | 0.006844146 |
| Tpm1          | Mus musculus tropomyosin 1, alpha (Tpm1), mRNA.                                                                                 | 245.9619 | 368.8087 | 0.006843097 |
| AI132487      | Mus musculus expressed sequence AI132487 (AI132487), mRNA.                                                                      | 8672.31  | 6372.834 | 0.006843019 |
| Wbscr16       | Mus musculus Williams-Beuren syndrome chromosome region 16 homolog (human) (Wbscr16), mRNA.                                     | 58.78437 | 29.29379 | 0.006993094 |
| Slc25a28      | Mus musculus solute carrier family 25, member 28 (Slc25a28), mRNA.                                                              | 355.35   | 236.1295 | 0.007023564 |
| Ctss          | Mus musculus cathepsin S (Ctss), mRNA.                                                                                          | 62.13412 | 103.1184 | 0.007007163 |

|               |                                                                                                                            |          |          |             |
|---------------|----------------------------------------------------------------------------------------------------------------------------|----------|----------|-------------|
| Grn           | Mus musculus granulin (Grn), mRNA.                                                                                         | 3131.159 | 2157.811 | 0.00714604  |
| Gtpbp2        | Mus musculus GTP binding protein 2 (Gtpbp2), mRNA.                                                                         | 198.7643 | 134.8863 | 0.007279059 |
| Itpk1         | Mus musculus inositol 1,3,4-triphosphate 5/6 kinase (Itpk1), mRNA.                                                         | 136.6362 | 92.78873 | 0.007346754 |
| Smpdl3a       | Mus musculus sphingomyelin phosphodiesterase, acid-like 3A (Smpdl3a), mRNA.                                                | 345.0114 | 514.5555 | 0.007345279 |
| Gls2          | Mus musculus glutaminase 2 (liver, mitochondrial) (Gls2), nuclear gene encoding mitochondrial protein, mRNA.               | 2103.753 | 3209.091 | 0.007400559 |
| Ptprb         | Mus musculus protein tyrosine phosphatase, receptor type, B (Ptprb), mRNA.                                                 | 350.8701 | 197.9612 | 0.00745326  |
| Flot2         | Mus musculus flotillin 2 (Flot2), transcript variant 2, mRNA.                                                              | 297.3822 | 184.5027 | 0.007692871 |
| Cyp1a2        | Mus musculus cytochrome P450, family 1, subfamily a, polypeptide 2 (Cyp1a2), mRNA.                                         | 1204.357 | 580.1827 | 0.007918558 |
| Ppp1cb        |                                                                                                                            | 68.68487 | 129.9096 | 0.007993707 |
| Nipsnap1      | Mus musculus 4-nitrophenylphosphatase domain and non-neuronal SNAP25-like protein homolog 1 (C. elegans) (Nipsnap1), mRNA. | 2512.194 | 1850.177 | 0.008095631 |
| Csrp1         | Mus musculus cysteine and glycine-rich protein 1 (Csrp1), mRNA.                                                            | 84.40464 | 135.2897 | 0.008123247 |
| Pdcd2l        | Mus musculus programmed cell death 2-like (Pdcd2l), mRNA.                                                                  | 166.172  | 115.26   | 0.008117625 |
| Nr5a2         | Mus musculus nuclear receptor subfamily 5, group A, member 2 (Nr5a2), mRNA.                                                | 59.23211 | 27.10571 | 0.008122649 |
| Vdac1         | Mus musculus voltage-dependent anion channel 1 (Vdac1), mRNA.                                                              | 357.3115 | 551.6018 | 0.008180537 |
| Pih1d1        | Mus musculus PIH1 domain containing 1 (Pih1d1), mRNA.                                                                      | 267.0642 | 190.4659 | 0.008191686 |
| Slc35b1       | Mus musculus solute carrier family 35, member B1 (Slc35b1), mRNA.                                                          | 948.8085 | 654.7081 | 0.008212684 |
| Pgam1         | Mus musculus phosphoglycerate mutase 1 (Pgam1), mRNA.                                                                      | 210.0663 | 322.8806 | 0.008274872 |
| Cyp3a13       | Mus musculus cytochrome P450, family 3, subfamily a, polypeptide 13 (Cyp3a13), mRNA.                                       | 1407.02  | 2023.648 | 0.008265494 |
| Tmbim6        | Mus musculus transmembrane BAX inhibitor motif containing 6 (Tmbim6), mRNA.                                                | 7426.901 | 4419.119 | 0.008251287 |
| Slc6a13       | Mus musculus solute carrier family 6 (neurotransmitter transporter, GABA), member 13 (Slc6a13), mRNA.                      | 1416.784 | 968.5245 | 0.008236275 |
| Srpk1         | Mus musculus serine/arginine-rich protein specific kinase 1 (Srpk1), mRNA.                                                 | 119.2335 | 77.51316 | 0.008286599 |
| Vps35         | Mus musculus vacuolar protein sorting 35 (Vps35), mRNA.                                                                    | 255.5242 | 394.5484 | 0.008331805 |
| Gng10         | Mus musculus guanine nucleotide binding protein (G protein), gamma 10 (Gng10), mRNA.                                       | 54.02669 | 93.13396 | 0.008345899 |
| Ephx2         | Mus musculus epoxide hydrolase 2, cytoplasmic (Ephx2), mRNA.                                                               | 3953.819 | 2920.249 | 0.008418921 |
| Pck1          | Mus musculus phosphoenolpyruvate carboxykinase 1, cytosolic (Pck1), mRNA.                                                  | 791.0479 | 1296.553 | 0.008461163 |
| Edf1          | Mus musculus endothelial differentiation-related factor 1 (Edf1), mRNA.                                                    | 2148.853 | 1367.925 | 0.008558879 |
| Mtpn          | Mus musculus myotrophin (Mtpn), mRNA.                                                                                      | 175.4415 | 277.7788 | 0.008570279 |
| 2010003O18Rik | Mus musculus RIKEN cDNA 2010003O18 gene (2010003O18Rik), mRNA.                                                             | 386.1813 | 279.4976 | 0.008731247 |
| Ccrn4l        | Mus musculus CCR4 carbon catabolite repression 4-like (S. cerevisiae) (Ccrn4l), mRNA.                                      | 271.8636 | 476.2597 | 0.008832057 |
| Tmem184b      | Mus musculus transmembrane protein 184b (Tmem184b), mRNA.                                                                  | 354.8952 | 256.3617 | 0.008832458 |
| Pdpk1         |                                                                                                                            | 163.5277 | 64.65093 | 0.008962714 |

|               |                                                                                                                                             |          |          |             |
|---------------|---------------------------------------------------------------------------------------------------------------------------------------------|----------|----------|-------------|
| Klhl17        | Mus musculus kelch-like 17 ( <i>Drosophila</i> ) ( <i>Klhl17</i> ), mRNA.                                                                   | 102.9025 | 59.32625 | 0.009084619 |
| 1110007L15Rik | Mus musculus RIKEN cDNA 1110007L15 gene (1110007L15Rik), mRNA.                                                                              | 305.5767 | 213.6359 | 0.009103996 |
| Cdc42ep1      | Mus musculus CDC42 effector protein (Rho GTPase binding) 1 ( <i>Cdc42ep1</i> ), mRNA.                                                       | 74.15111 | 34.42813 | 0.00923546  |
| Ncoa4         | Mus musculus nuclear receptor coactivator 4 ( <i>Ncoa4</i> ), transcript variant 2, mRNA.                                                   | 191.468  | 313.9149 | 0.009225974 |
| Scamp2        | Mus musculus secretory carrier membrane protein 2 ( <i>Scamp2</i> ), mRNA.                                                                  | 264.1192 | 163.1795 | 0.009328419 |
| Tmem125       | Mus musculus transmembrane protein 125 ( <i>Tmem125</i> ), mRNA.                                                                            | 103.4304 | 53.6482  | 0.009528204 |
| Cml4          | Mus musculus camello-like 4 ( <i>Cml4</i> ), mRNA.                                                                                          | 131.7511 | 33.07752 | 0.009515314 |
| Robo1         | Mus musculus roundabout homolog 1 ( <i>Drosophila</i> ) ( <i>Robo1</i> ), mRNA.                                                             | 25.65074 | 55.53836 | 0.009839009 |
| Slc23a2       | Mus musculus solute carrier family 23 (nucleobase transporters), member 2 ( <i>Slc23a2</i> ), mRNA.                                         | 61.34507 | 36.17116 | 0.00985119  |
| Agpat9        | Mus musculus 1-acylglycerol-3-phosphate O-acyltransferase 9 ( <i>Agpat9</i> ), transcript variant 1, mRNA.                                  | 54.81843 | 98.0899  | 0.009837985 |
| Mast2         | Mus musculus microtubule associated serine/threonine kinase 2 ( <i>Mast2</i> ), transcript variant 2, mRNA.                                 | 54.23641 | 26.69653 | 0.009970426 |
| Cldn1         | Mus musculus claudin 1 ( <i>Cldn1</i> ), mRNA.                                                                                              | 127.1851 | 195.8201 | 0.010152205 |
| LOC100047707  | PREDICTED: Mus musculus hypothetical protein LOC100047707 ( <i>LOC100047707</i> ), mRNA.                                                    | 572.1984 | 380.0473 | 0.010306426 |
| Tbl2          |                                                                                                                                             | 86.73625 | 52.29107 | 0.010463594 |
| Lrp10         | Mus musculus low-density lipoprotein receptor-related protein 10 ( <i>Lrp10</i> ), mRNA.                                                    | 1236.035 | 914.4814 | 0.010472316 |
| Tbc1d2b       | Mus musculus TBC1 domain family, member 2B ( <i>Tbc1d2b</i> ), mRNA.                                                                        | 91.44088 | 57.99295 | 0.010470023 |
| Serpina11     | Mus musculus serine (or cysteine) peptidase inhibitor, clade A (alpha-1 antiproteinase, antitrypsin), member 11 ( <i>Serpina11</i> ), mRNA. | 88.81459 | 49.96362 | 0.010448564 |
| Hsd17b7       | Mus musculus hydroxysteroid (17-beta) dehydrogenase 7 ( <i>Hsd17b7</i> ), mRNA.                                                             | 854.032  | 589.4669 | 0.010461659 |
| Cdk5rap3      | Mus musculus CDK5 regulatory subunit associated protein 3 ( <i>Cdk5rap3</i> ), mRNA.                                                        | 991.6548 | 731.1014 | 0.010648626 |
| Rdh14         | Mus musculus retinol dehydrogenase 14 (all-trans and 9-cis) ( <i>Rdh14</i> ), mRNA.                                                         | 268.9867 | 426.0078 | 0.010820781 |
| Notum         | Mus musculus notum pectinacetyltransferase homolog ( <i>Drosophila</i> ) ( <i>Notum</i> ), mRNA.                                            | 101.5877 | 44.38748 | 0.010825517 |
| Ces1          | Mus musculus carboxylesterase 1 ( <i>Ces1</i> ), mRNA.                                                                                      | 93.91184 | 39.9765  | 0.011099609 |
| Tmie          | Mus musculus transmembrane inner ear ( <i>Tmie</i> ), mRNA.                                                                                 | 171.9731 | 83.28265 | 0.011114571 |
| Klhl21        | Mus musculus kelch-like 21 ( <i>Drosophila</i> ) ( <i>Klhl21</i> ), mRNA.                                                                   | 454.131  | 310.1773 | 0.011149355 |
| Sbf1          | Mus musculus SET binding factor 1 ( <i>Sbf1</i> ), mRNA.                                                                                    | 126.7361 | 61.56127 | 0.011148302 |
| Parp14        | Mus musculus poly (ADP-ribose) polymerase family, member 14 ( <i>Parp14</i> ), mRNA. XM_901644 XM_916789 XM_924484 XM_924488                | 117.5372 | 79.87168 | 0.011167647 |
| LOC666676     | PREDICTED: Mus musculus similar to ADP-ribosylation factor ( <i>LOC666676</i> ), misc RNA.                                                  | 1889.546 | 1267.424 | 0.011173303 |
| Uaca          | Mus musculus uveal autoantigen with coiled-coil domains and ankyrin repeats ( <i>Uaca</i> ), mRNA.                                          | 158.2787 | 70.53745 | 0.01120081  |
| Zkscan17      | Mus musculus zinc finger with KRAB and SCAN domains 17 ( <i>Zkscan17</i> ), mRNA.                                                           | 36.71892 | 66.5616  | 0.011560862 |
| Vps54         | Mus musculus vacuolar protein sorting 54 (yeast) ( <i>Vps54</i> ), mRNA.                                                                    | 342.7635 | 249.5139 | 0.01154524  |
| LOC100047490  | PREDICTED: Mus musculus similar to putative oral cancer suppressor ( <i>LOC100047490</i> ), mRNA.                                           | 1535.903 | 1141.738 | 0.011657935 |
| Tmem82        | Mus musculus transmembrane protein 82 ( <i>Tmem82</i> ), mRNA.                                                                              | 581.4606 | 428.2731 | 0.011637058 |

|               |                                                                                                                                                               |          |          |             |
|---------------|---------------------------------------------------------------------------------------------------------------------------------------------------------------|----------|----------|-------------|
| Slc35a1       | Mus musculus solute carrier family 35 (CMP-sialic acid transporter), member 1 (Slc35a1), mRNA.                                                                | 39.18585 | 68.98051 | 0.011700507 |
| Zfx2          | Mus musculus zinc finger homeobox 2 (Zfx2), mRNA.                                                                                                             | 114.3089 | 67.83606 | 0.011836384 |
| Ube2g1        | Mus musculus ubiquitin-conjugating enzyme E2G 1 (UBC7 homolog, C. elegans) (Ube2g1), mRNA.                                                                    | 298.2013 | 451.6044 | 0.011823371 |
| Sp5           | Mus musculus trans-acting transcription factor 5 (Sp5), mRNA.                                                                                                 | 50.69048 | 16.79656 | 0.011949713 |
| Trap1         | Mus musculus TNF receptor-associated protein 1 (Trap1), mRNA.                                                                                                 | 739.9286 | 483.8791 | 0.011955494 |
| Gak           | Mus musculus cyclin G associated kinase (Gak), mRNA.                                                                                                          | 1192.841 | 884.9863 | 0.012011256 |
| Pcyt1a        | Mus musculus phosphate cytidyltransferase 1, choline, alpha isoform (Pcyt1a), mRNA.                                                                           | 238.5474 | 25.36348 | 0.012031096 |
| Laptm5        | Mus musculus lysosomal-associated protein transmembrane 5 (Laptm5), mRNA.                                                                                     | 374.0565 | 265.1433 | 0.012307188 |
| Slc35c1       | Mus musculus solute carrier family 35, member C1 (Slc35c1), transcript variant 2, mRNA.                                                                       | 192.9835 | 101.0669 | 0.012288201 |
| Slc25a15      | Mus musculus solute carrier family 25 (mitochondrial carrier ornithine transporter), member 15 (Slc25a15), nuclear gene encoding mitochondrial protein, mRNA. | 1640.956 | 2280.31  | 0.012269945 |
| Erc3          | Mus musculus excision repair cross-complementing rodent repair deficiency, complementation group 3 (Erc3), mRNA.                                              | 202.2549 | 136.418  | 0.012245253 |
| Ly6e          | Mus musculus lymphocyte antigen 6 complex, locus E (Ly6e), mRNA.                                                                                              | 230.061  | 431.7086 | 0.012396375 |
| Tap2          | Mus musculus transporter 2, ATP-binding cassette, sub-family B (MDR/TAP) (Tap2), mRNA.                                                                        | 170.8864 | 84.6635  | 0.012679715 |
| Prdm4         | Mus musculus PR domain containing 4 (Prdm4), mRNA.                                                                                                            | 113.6607 | 77.41357 | 0.012899714 |
| Th1l          | Mus musculus TH1-like homolog (Drosophila) (Th1l), mRNA.                                                                                                      | 136.3145 | 88.06574 | 0.012942986 |
| Fbxo31        | Mus musculus F-box protein 31 (Fbxo31), mRNA.                                                                                                                 | 447.8902 | 402.9291 | 0.013003991 |
| Faah          | Mus musculus fatty acid amide hydrolase (Faah), mRNA.                                                                                                         | 421.6407 | 282.4554 | 0.013121323 |
| Ttc14         |                                                                                                                                                               | 50.65588 | 28.31575 | 0.013152017 |
| Zfp292        | PREDICTED: Mus musculus zinc finger protein 292, transcript variant 4 (Zfp292), mRNA.                                                                         | 62.66404 | 25.77993 | 0.013375157 |
| Aldh1a1       | Mus musculus aldehyde dehydrogenase family 1, subfamily A1 (Aldh1a1), mRNA.                                                                                   | 2603.117 | 1810.93  | 0.013463258 |
| 2810410P22Rik |                                                                                                                                                               | 133.7387 | 217.5929 | 0.01368306  |
| Ptk2          | Mus musculus PTK2 protein tyrosine kinase 2 (Ptk2), mRNA.                                                                                                     | 211.7845 | 152.3291 | 0.014174248 |
| Tmem56        | Mus musculus transmembrane protein 56 (Tmem56), mRNA.                                                                                                         | 1671.535 | 1250.516 | 0.014148212 |
| Epb4.1        | Mus musculus erythrocyte protein band 4.1 (Epb4.1), mRNA.                                                                                                     | 97.64698 | 149.1676 | 0.014129664 |
| Brd2          | Mus musculus bromodomain containing 2 (Brd2), transcript variant 2, mRNA.                                                                                     | 497.5613 | 392.2824 | 0.014189852 |
| Retsat        | Mus musculus retinol saturase (all trans retinol 13,14 reductase) (Retsat), mRNA.                                                                             | 8346.23  | 5654.976 | 0.014203278 |
| Brms1         | Mus musculus breast cancer metastasis-suppressor 1 (Brms1), mRNA.                                                                                             | 380.7105 | 276.4211 | 0.014219228 |
| 3110049J23Rik | Mus musculus RIKEN cDNA 3110049J23 gene (3110049J23Rik), mRNA.                                                                                                | 2513.667 | 1790.214 | 0.014230173 |
| Mum1          | Mus musculus melanoma associated antigen (mutated) 1 (Mum1), mRNA.                                                                                            | 102.2678 | 67.05514 | 0.014225484 |
| Alb           | Mus musculus albumin (Alb), mRNA.                                                                                                                             | 71.2487  | 111.7027 | 0.014293764 |
| Ormdl3        | Mus musculus ORM1-like 3 (S. cerevisiae) (Ormdl3), mRNA.                                                                                                      | 834.9692 | 622.3183 | 0.014572795 |
| Anxa6         | Mus musculus annexin A6 (Anxa6), mRNA.                                                                                                                        | 609.0172 | 866.6853 | 0.014655269 |



|               |                                                                                                                |          |          |             |
|---------------|----------------------------------------------------------------------------------------------------------------|----------|----------|-------------|
| Tfam          | Mus musculus transcription factor A, mitochondrial (Tfam), nuclear gene encoding mitochondrial protein, mRNA.  | 272.0764 | 395.8498 | 0.014781632 |
| Ppid          |                                                                                                                | 605.7607 | 886.5176 | 0.014762322 |
| Gbl           | Mus musculus G protein beta subunit-like (Gbl), mRNA.                                                          | 65.7462  | 38.26092 | 0.014822676 |
| E2f4          | Mus musculus E2F transcription factor 4 (E2f4), mRNA.                                                          | 44.21812 | 77.9423  | 0.01483656  |
| Pcbp2         | Mus musculus poly(rC) binding protein 2 (Pcbp2), mRNA.                                                         | 1156.294 | 1830.547 | 0.014847812 |
| Tgfbrap1      | Mus musculus transforming growth factor, beta receptor associated protein 1 (Tgfbrap1), mRNA.                  | 579.7122 | 368.9411 | 0.014909063 |
| Trim11        | Mus musculus tripartite motif-containing 11 (Trim11), mRNA.                                                    | 60.72368 | 36.85886 | 0.015059754 |
| Trim56        | Mus musculus tripartite motif-containing 56 (Trim56), mRNA.                                                    | 68.89846 | 41.232   | 0.015046934 |
| Tmem204       | Mus musculus transmembrane protein 204 (Tmem204), mRNA.                                                        | 266.9102 | 179.2052 | 0.015020272 |
| Adrb2         | Mus musculus adrenergic receptor, beta 2 (Adrb2), mRNA.                                                        | 23.15055 | 53.80099 | 0.015167333 |
| Clpp          | Mus musculus caseinolytic peptidase, ATP-dependent, proteolytic subunit homolog (E. coli) (Clpp), mRNA.        | 498.1589 | 369.3368 | 0.015237904 |
| Fntb          | Mus musculus farnesyltransferase, CAAX box, beta (Fntb), mRNA.                                                 | 111.9734 | 76.74468 | 0.015327554 |
| Snx17         | Mus musculus sorting nexin 17 (Snx17), mRNA.                                                                   | 191.3881 | 127.2708 | 0.015333068 |
| Nudt12        | Mus musculus nudix (nucleoside diphosphate linked moiety X)-type motif 12 (Nudt12), mRNA.                      | 136.8565 | 212.8726 | 0.015431562 |
| Scoc          | Mus musculus short coiled-coil protein (Scoc), transcript variant 1, mRNA.                                     | 77.59225 | 129.8371 | 0.015586811 |
| Sirt3         | Mus musculus sirtuin 3 (silent mating type information regulation 2, homolog) 3 (S. cerevisiae) (Sirt3), mRNA. | 1127.952 | 840.7039 | 0.015574541 |
| Sepx1         |                                                                                                                | 880.2712 | 713.2773 | 0.015592467 |
| Prdx3         |                                                                                                                | 523.9431 | 768.2115 | 0.015583462 |
| Ddit4         | Mus musculus DNA-damage-inducible transcript 4 (Ddit4), mRNA.                                                  | 498.1435 | 897.7661 | 0.015609631 |
| Adipor2       |                                                                                                                | 2545.138 | 1899.612 | 0.015656508 |
| Ddx54         | Mus musculus DEAD (Asp-Glu-Ala-Asp) box polypeptide 54 (Ddx54), mRNA.                                          | 470.6063 | 348.5895 | 0.015720223 |
| Tcfe3         | Mus musculus transcription factor E3 (Tcfe3), mRNA.                                                            | 57.77616 | 92.54372 | 0.015809351 |
| 2510012J08Rik | Mus musculus RIKEN cDNA 2510012J08 gene (2510012J08Rik), mRNA.                                                 | 61.97665 | 41.53405 | 0.015922232 |
| Vdac3         | Mus musculus voltage-dependent anion channel 3 (Vdac3), mRNA.                                                  | 555.0676 | 786.9937 | 0.015924924 |
| Flot1         | Mus musculus flotillin 1 (Flot1), mRNA.                                                                        | 160.2012 | 103.21   | 0.016047904 |
| Cyb5b         | Mus musculus cytochrome b5 type B (Cyb5b), mRNA.                                                               | 1421.15  | 1007.131 | 0.01621309  |
| Psmc4         | Mus musculus proteasome (prosome, macropain) 26S subunit, ATPase, 4 (Psmc4), mRNA.                             | 1702.726 | 1182.815 | 0.0162367   |
| Eif3eip       | Mus musculus eukaryotic translation initiation factor 3, subunit E interacting protein (Eif3eip), mRNA.        | 1039.663 | 781.3517 | 0.016607271 |
| Ugcg          | Mus musculus UDP-glucose ceramide glucosyltransferase (Ugcg), mRNA.                                            | 241.6999 | 366.8372 | 0.016603792 |
| Pptc7         | Mus musculus PTC7 protein phosphatase homolog (S. cerevisiae) (Pptc7), mRNA.                                   | 404.0277 | 574.1801 | 0.016636111 |
| S100a10       | Mus musculus S100 calcium binding protein A10 (calpactin) (S100a10), mRNA.                                     | 949.8355 | 499.8666 | 0.016608324 |
| Acox1         | Mus musculus acyl-Coenzyme A oxidase 1, palmitoyl (Acox1), mRNA.                                               | 359.225  | 208.059  | 0.016601881 |
| Luzp1         |                                                                                                                | 63.84873 | 37.85814 | 0.016719808 |

|               |                                                                                                                                             |          |          |             |
|---------------|---------------------------------------------------------------------------------------------------------------------------------------------|----------|----------|-------------|
| Slc7a2        | Mus musculus solute carrier family 7 (cationic amino acid transporter, y+ system), member 2 (Slc7a2), transcript variant 2, mRNA.           | 382.0905 | 618.551  | 0.017089869 |
| Saps1         | Mus musculus SAPS domain family, member 1 (Saps1), mRNA.                                                                                    | 80.67386 | 123.4059 | 0.017160924 |
| Oplah         | Mus musculus 5-oxoprolinase (ATP-hydrolysing) (Oplah), mRNA.                                                                                | 507.5269 | 263.5738 | 0.017221028 |
| Pkd2          | Mus musculus polycystic kidney disease 2 (Pkd2), mRNA.                                                                                      | 39.86549 | 68.74049 | 0.017279092 |
| Tkt           | Mus musculus transketolase (Tkt), mRNA.                                                                                                     | 171.7791 | 94.88831 | 0.017370657 |
| Hectd3        | Mus musculus HECT domain containing 3 (Hectd3), mRNA.                                                                                       | 143.0726 | 89.67964 | 0.017347704 |
| Abcb11        | Mus musculus ATP-binding cassette, sub-family B (MDR/TAP), member 11 (Abcb11), mRNA.                                                        | 391.1264 | 554.8844 | 0.017357902 |
| Ela1          | Mus musculus elastase 1, pancreatic (Ela1), mRNA.                                                                                           | 107.2928 | 62.58649 | 0.017736171 |
| Aadac         | Mus musculus arylacetamide deacetylase (esterase) (Aadac), mRNA.                                                                            | 303.426  | 435.5358 | 0.018107353 |
| Acot8         | Mus musculus acyl-CoA thioesterase 8 (Acot8), mRNA.                                                                                         | 382.9606 | 244.632  | 0.018226089 |
| Atp5o         | Mus musculus ATP synthase, H+ transporting, mitochondrial F1 complex, O subunit (Atp5o), nuclear gene encoding mitochondrial protein, mRNA. | 201.659  | 97.74513 | 0.018463687 |
| Timm8a1       | Mus musculus translocase of inner mitochondrial membrane 8 homolog a1 (yeast) (Timm8a1), mRNA.                                              | 1075.864 | 1506.832 | 0.018470166 |
| Agxt          | Mus musculus alanine-glyoxylate aminotransferase (Agxt), mRNA.                                                                              | 1320.72  | 1872.108 | 0.018475601 |
| Ppp3cb        |                                                                                                                                             | 310.8148 | 229.4781 | 0.018460258 |
| 1810046J19Rik | Mus musculus RIKEN cDNA 1810046J19 gene (1810046J19Rik), mRNA.                                                                              | 1398.834 | 837.2908 | 0.01858803  |
| St3gal3       | Mus musculus ST3 beta-galactoside alpha-2,3-sialyltransferase 3 (St3gal3), mRNA.                                                            | 287.7762 | 154.9295 | 0.018713472 |
| Rnf185        | Mus musculus ring finger protein 185 (Rnf185), mRNA.                                                                                        | 104.0568 | 69.7944  | 0.018726075 |
| Kcmf1         |                                                                                                                                             | 80.23026 | 50.34541 | 0.018748501 |
| Triobp        | Mus musculus TRIO and F-actin binding protein (Triobp), transcript variant 3, mRNA.                                                         | 308.5567 | 180.0165 | 0.018782946 |
| Cbs           | Mus musculus cystathionine beta-synthase (Cbs), transcript variant 1, mRNA.                                                                 | 755.8661 | 1074.982 | 0.018809543 |
| Ets2          | Mus musculus E26 avian leukemia oncogene 2, 3' domain (Ets2), mRNA.                                                                         | 335.7091 | 248.7468 | 0.019112266 |
| Trim26        | Mus musculus tripartite motif-containing 26 (Trim26), transcript variant 1, mRNA.                                                           | 137.8511 | 97.56893 | 0.019237936 |
| D19Wsu162e    | Mus musculus DNA segment, Chr 19, Wayne State University 162, expressed (D19Wsu162e), mRNA.                                                 | 4031.123 | 3056.538 | 0.019224193 |
| Ttc13         |                                                                                                                                             | 579.2963 | 389.505  | 0.019584619 |
| Kctd2         | Mus musculus potassium channel tetramerisation domain containing 2 (Kctd2), mRNA.                                                           | 389.4616 | 268.9135 | 0.01971871  |
| Irf2bp1       | Mus musculus interferon regulatory factor 2 binding protein 1 (Irf2bp1), mRNA.                                                              | 84.77026 | 45.79184 | 0.019691202 |
| Rdh9          | Mus musculus retinol dehydrogenase 9 (Rdh9), mRNA.                                                                                          | 349.5375 | 256.9172 | 0.01997484  |
| Ihpk2         | Mus musculus inositol hexaphosphate kinase 2 (Ihpk2), mRNA.                                                                                 | 30.683   | 117.3383 | 0.019977296 |
| Arl5a         | Mus musculus ADP-ribosylation factor-like 5A (Arl5a), mRNA.                                                                                 | 147.5342 | 218.1811 | 0.019961559 |
| Pigt          | Mus musculus phosphatidylinositol glycan anchor biosynthesis, class T (Pigt), mRNA. XM_922599                                               | 77.52597 | 130.7744 | 0.020109929 |
| Pip4k2c       | Mus musculus phosphatidylinositol-5-phosphate 4-kinase, type II, gamma (Pip4k2c), mRNA.                                                     | 278.3059 | 175.1611 | 0.020960515 |
| Aldh1l1       | Mus musculus aldehyde dehydrogenase 1 family, member L1 (Aldh1l1), mRNA.                                                                    | 700.7659 | 966.4935 | 0.020967839 |

|               |                                                                                                                                                               |          |          |             |
|---------------|---------------------------------------------------------------------------------------------------------------------------------------------------------------|----------|----------|-------------|
| Ncaph2        | Mus musculus non-SMC condensin II complex, subunit H2 (Ncaph2), mRNA.                                                                                         | 77.20821 | 50.32397 | 0.020988226 |
| Uchl3         | Mus musculus ubiquitin carboxyl-terminal esterase L3 (ubiquitin thiolesterase) (Uchl3), mRNA.                                                                 | 176.1688 | 285.8023 | 0.02097177  |
| Acat1         |                                                                                                                                                               | 212.2838 | 112.0818 | 0.020964126 |
| 2700087H15Rik |                                                                                                                                                               | 119.2103 | 76.95084 | 0.021000746 |
| LOC100047674  | PREDICTED: Mus musculus similar to solute carrier family 35 (UDP-glucuronic acid/UDP-N-acetylgalactosamine dual transporter), member D1 (LOC100047674), mRNA. | 109.3042 | 69.81784 | 0.021060128 |
| Sdc4          | Mus musculus syndecan 4 (Sdc4), mRNA.                                                                                                                         | 1094.561 | 644.335  | 0.021150838 |
| Ccdc91        | Mus musculus coiled-coil domain containing 91 (Ccdc91), mRNA.                                                                                                 | 66.32069 | 105.8421 | 0.021142067 |
| Vars          | Mus musculus valyl-tRNA synthetase (Vars), nuclear gene encoding mitochondrial protein, mRNA.                                                                 | 73.05756 | 50.24041 | 0.021117747 |
| Tsc2          | Mus musculus tuberous sclerosis 2 (Tsc2), transcript variant 2, mRNA.                                                                                         | 238.8331 | 144.4661 | 0.021257687 |
| Tspan12       | Mus musculus tetraspanin 12 (Tspan12), mRNA.                                                                                                                  | 754.611  | 1248.462 | 0.021222753 |
| Tmprss2       | Mus musculus transmembrane protease, serine 2 (Tmprss2), mRNA.                                                                                                | 28.70782 | 52.37364 | 0.021359432 |
| Nrf1          | Mus musculus nuclear respiratory factor 1 (Nrf1), mRNA.                                                                                                       | 74.14382 | 48.41471 | 0.021371251 |
| Zer1          | Mus musculus zer-1 homolog (C. elegans) (Zer1), mRNA.                                                                                                         | 164.5263 | 111.5887 | 0.02134531  |
| Fam20a        | Mus musculus family with sequence similarity 20, member A (Fam20a), mRNA.                                                                                     | 261.848  | 157.8021 | 0.021481482 |
| Lemd2         | Mus musculus LEM domain containing 2 (Lemd2), mRNA.                                                                                                           | 385.6819 | 288.1639 | 0.021691734 |
| Serinc3       | Mus musculus serine incorporator 3 (Serinc3), mRNA.                                                                                                           | 1098.368 | 806.9874 | 0.021982372 |
| Lyve1         | Mus musculus lymphatic vessel endothelial hyaluronan receptor 1 (Lyve1), mRNA.                                                                                | 386.3093 | 594.9754 | 0.022125245 |
| Cope          | Mus musculus coatomer protein complex, subunit epsilon (Cope), mRNA.                                                                                          | 540.6417 | 400.0082 | 0.022163935 |
| Pat1          | Mus musculus protein associated with topoisomerase II homolog 1 (yeast) (Pat1), mRNA.                                                                         | 77.32915 | 48.63939 | 0.022157914 |
| Glt25d1       | Mus musculus glycosyltransferase 25 domain containing 1 (Glt25d1), mRNA.                                                                                      | 500.1682 | 375.9228 | 0.022120713 |
| Creld1        | Mus musculus cysteine-rich with EGF-like domains 1 (Creld1), mRNA.                                                                                            | 481.8274 | 347.7898 | 0.022146832 |
| Zfp524        | Mus musculus zinc finger protein 524 (Zfp524), mRNA.                                                                                                          | 144.6318 | 235.0527 | 0.022168704 |
| Hnrnpf        | Mus musculus heterogeneous nuclear ribonucleoprotein F (Hnrnpf), mRNA.                                                                                        | 77.72704 | 120.024  | 0.022287237 |
| Ganab         | Mus musculus alpha glucosidase 2 alpha neutral subunit (Ganab), mRNA.                                                                                         | 260.0559 | 403.7473 | 0.022494088 |
| Akap8l        | Mus musculus A kinase (PRKA) anchor protein 8-like (Akap8l), mRNA.                                                                                            | 83.66272 | 53.07448 | 0.022474847 |
| Lasp1         | Mus musculus LIM and SH3 protein 1 (Lasp1), mRNA.                                                                                                             | 425.3545 | 265.4564 | 0.022562557 |
| Hamp2         | Mus musculus hepcidin antimicrobial peptide 2 (Hamp2), mRNA.                                                                                                  | 483.6172 | 1906.868 | 0.022563273 |
| Wdr45         | Mus musculus WD repeat domain 45 (Wdr45), mRNA.                                                                                                               | 431.2422 | 323.5481 | 0.022604405 |
| Ostm1         | Mus musculus osteopetrosis associated transmembrane protein 1 (Ostm1), mRNA.                                                                                  | 230.046  | 325.8357 | 0.022569569 |
| Zmat1         | Mus musculus zinc finger, matrin type 1 (Zmat1), mRNA.                                                                                                        | 60.24738 | 28.40815 | 0.022652891 |
| 2510039O18Rik | Mus musculus RIKEN cDNA 2510039O18 gene (2510039O18Rik), mRNA.                                                                                                | 35.50389 | 63.4996  | 0.022771057 |
| Rrp15         | Mus musculus ribosomal RNA processing 15 homolog (S. cerevisiae) (Rrp15), mRNA.                                                                               | 114.249  | 78.06145 | 0.02273814  |
| Ccng1         | Mus musculus cyclin G1 (Ccng1), mRNA.                                                                                                                         | 110.0961 | 197.6897 | 0.022866299 |
| Eng           | Mus musculus endoglin (Eng), mRNA.                                                                                                                            | 140.9562 | 203.2899 | 0.023220523 |

|               |                                                                                                               |          |          |             |
|---------------|---------------------------------------------------------------------------------------------------------------|----------|----------|-------------|
| Traf6         | Mus musculus Tnf receptor-associated factor 6 (Traf6), mRNA.                                                  | 80.4511  | 47.21491 | 0.023341474 |
| Dctn2         | Mus musculus dynactin 2 (Dctn2), mRNA.                                                                        | 919.4249 | 670.8024 | 0.023870292 |
| Rock1         | Mus musculus Rho-associated coiled-coil containing protein kinase 1 (Rock1), mRNA.                            | 29.22819 | 52.9808  | 0.023850713 |
| F7            | Mus musculus coagulation factor VII (F7), mRNA.                                                               | 290.4184 | 431.5634 | 0.024344852 |
| C2            | Mus musculus complement component 2 (within H-2S) (C2), mRNA.                                                 | 1445.596 | 1101.756 | 0.024487931 |
| F13b          | Mus musculus coagulation factor XIII, beta subunit (F13b), mRNA.                                              | 1122.882 | 1607.167 | 0.024538906 |
| Angptl4       | Mus musculus angiopoietin-like 4 (Angptl4), mRNA.                                                             | 3432.088 | 2597.534 | 0.024500134 |
| Arl6ip1       | Mus musculus ADP-ribosylation factor-like 6 interacting protein 1 (Arl6ip1), mRNA.                            | 3262.134 | 2484.684 | 0.02450546  |
| D12Erttd647e  | Mus musculus DNA segment, Chr 12, ERATO Doi 647, expressed (D12Erttd647e), transcript variant 5, mRNA.        | 1499.183 | 1029.416 | 0.024498156 |
| Ghitm         | Mus musculus growth hormone inducible transmembrane protein (Ghitm), mRNA.                                    | 549.7847 | 818.7251 | 0.024684486 |
| Ppme1         | Mus musculus protein phosphatase methylesterase 1 (Ppme1), mRNA.                                              | 368.6635 | 231.9596 | 0.024741608 |
| Sox5          | Mus musculus SRY-box containing gene 5 (Sox5), mRNA.                                                          | 54.29636 | 24.44615 | 0.024731752 |
| Snd1          | Mus musculus staphylococcal nuclease and tudor domain containing 1 (Snd1), mRNA.                              | 47.07686 | 78.20978 | 0.024824755 |
| Tuba8         | Mus musculus tubulin, alpha 8 (Tuba8), mRNA.                                                                  | 69.78608 | 113.5225 | 0.024802313 |
| Ipmk          | Mus musculus inositol polyphosphate multikinase (Ipmk), mRNA.                                                 | 143.5869 | 99.75919 | 0.024766094 |
| Tmem68        | Mus musculus transmembrane protein 68 (Tmem68), mRNA.                                                         | 131.686  | 193.4298 | 0.024856786 |
| Vps37b        | Mus musculus vacuolar protein sorting 37B (yeast) (Vps37b), mRNA.                                             | 123.4123 | 76.18056 | 0.024907466 |
| Actn4         | Mus musculus actinin alpha 4 (Actn4), mRNA.                                                                   | 253.0555 | 389.7635 | 0.025123216 |
| 2310047M10Rik | Mus musculus RIKEN cDNA 2310047M10 gene (2310047M10Rik), mRNA.                                                | 101.4844 | 70.09947 | 0.025108342 |
| Slc25a42      | Mus musculus solute carrier family 25, member 42 (Slc25a42), mRNA.                                            | 169.2002 | 245.6051 | 0.025215346 |
| Thap4         | Mus musculus THAP domain containing 4 (Thap4), mRNA.                                                          | 200.7984 | 137.4189 | 0.025176417 |
| Tmem2         | Mus musculus transmembrane protein 2 (Tmem2), transcript variant 2, mRNA.                                     | 67.41917 | 44.45415 | 0.025149423 |
| Vps26b        | Mus musculus vacuolar protein sorting 26 homolog B (yeast) (Vps26b), mRNA.                                    | 96.44016 | 62.06787 | 0.025201373 |
| D9Erttd392e   | Mus musculus dolichyl-di-phosphooligosaccharide-protein glycotransferase (Ddost), mRNA.                       | 625.0416 | 446.881  | 0.025229723 |
| Mrpl38        | Mus musculus mitochondrial ribosomal protein L38 (Mrpl38), nuclear gene encoding mitochondrial protein, mRNA. | 161.2073 | 104.2567 | 0.025240959 |
| Ogfrl1        | Mus musculus opioid growth factor receptor-like 1 (Ogfrl1), mRNA.                                             | 925.0972 | 664.7674 | 0.025522917 |
| 2810004N20Rik | Mus musculus proline arginine-rich end leucine-rich repeat (Prelp), mRNA.                                     | 50.81292 | 91.90988 | 0.025646721 |
| Prelp         | Mus musculus proline arginine-rich end leucine-rich repeat (Prelp), mRNA.                                     | 853.7867 | 1176.82  | 0.025715706 |
| Serpind1      | Mus musculus serine (or cysteine) peptidase inhibitor, clade D, member 1 (Serpind1), mRNA.                    | 719.4131 | 534.2349 | 0.026131307 |
| Vamp2         | Mus musculus vesicle-associated membrane protein 2 (Vamp2), mRNA.                                             | 1265.692 | 1739.442 | 0.026149891 |
| Arih2         | Mus musculus ariadne homolog 2 (Drosophila) (Arih2), mRNA.                                                    | 67.60937 | 28.41884 | 0.026128815 |
|               |                                                                                                               | 531.8572 | 356.4103 | 0.026147285 |

|               |                                                                                                                                 |          |          |             |
|---------------|---------------------------------------------------------------------------------------------------------------------------------|----------|----------|-------------|
| Bat3          | Mus musculus HLA-B-associated transcript 3 (Bat3), mRNA.                                                                        | 135.9009 | 70.79557 | 0.026167518 |
| Uba2          | Mus musculus ubiquitin-like modifier activating enzyme 2 (Uba2), mRNA.                                                          | 173.8915 | 247.3613 | 0.026128143 |
| Nras          | Mus musculus neuroblastoma ras oncogene (Nras), mRNA.                                                                           | 351.0192 | 254.7816 | 0.026517318 |
| Mgll          | Mus musculus monoglyceride lipase (Mgll), mRNA.                                                                                 | 781.1602 | 563.1598 | 0.026622492 |
| C1qbp         | Mus musculus complement component 1, q subcomponent binding protein (C1qbp), nuclear gene encoding mitochondrial protein, mRNA. | 358.2671 | 533.3073 | 0.026586664 |
| D930001I22Rik | Mus musculus RIKEN cDNA D930001I22 gene (D930001I22Rik), mRNA.                                                                  | 723.4947 | 550.5939 | 0.026686649 |
| Csnk1g2       | Mus musculus casein kinase 1, gamma 2 (Csnk1g2), mRNA.                                                                          | 359.9799 | 210.9548 | 0.026900248 |
| Mfn2          | Mus musculus mitofusin 2 (Mfn2), nuclear gene encoding mitochondrial protein, mRNA. XM_919144 XM_919157 XM_919164               | 1209.456 | 924.5873 | 0.026923379 |
| Neu1          | Mus musculus neuraminidase 1 (Neu1), mRNA.                                                                                      | 441.3895 | 333.6546 | 0.026928606 |
| Eno1          | Mus musculus enolase 1, alpha non-neuron (Eno1), mRNA.                                                                          | 1591.756 | 2180.35  | 0.027346529 |
| Ppp1r8        | Mus musculus protein phosphatase 1, regulatory (inhibitor) subunit 8 (Ppp1r8), mRNA.                                            | 56.55326 | 88.14198 | 0.027335724 |
| Cd9           |                                                                                                                                 | 147.8931 | 228.6001 | 0.027405705 |
| Maf1          | Mus musculus MAF1 homolog ( <i>S. cerevisiae</i> ) (Maf1), mRNA.                                                                | 544.5149 | 413.3688 | 0.027488079 |
| Rab10         | Mus musculus RAB10, member RAS oncogene family (Rab10), mRNA.                                                                   | 85.02361 | 137.3133 | 0.027652718 |
| Bgn           | Mus musculus biglycan (Bgn), mRNA.                                                                                              | 740.6536 | 564.557  | 0.027645807 |
| Mmrn2         | Mus musculus multimerin 2 (Mmrn2), mRNA.                                                                                        | 136.9071 | 98.58377 | 0.027802428 |
| Med16         | Mus musculus mediator complex subunit 16 (Med16), mRNA.                                                                         | 169.8779 | 106.3566 | 0.027819556 |
| Serpina12     | Mus musculus serine (or cysteine) peptidase inhibitor, clade A (alpha-1 antitrypsin, antitrypsin), member 12 (Serpina12), mRNA. | 174.9899 | 10.40049 | 0.028177255 |
| Sult1a1       | Mus musculus sulfotransferase family 1A, phenol-preferring, member 1 (Sult1a1), mRNA.                                           | 4614.276 | 6846.341 | 0.028173004 |
| Mib2          | Mus musculus mindbomb homolog 2 ( <i>Drosophila</i> ) (Mib2), mRNA.                                                             | 216.6493 | 121.349  | 0.028446552 |
| Uba5          | Mus musculus ubiquitin-like modifier activating enzyme 5 (Uba5), mRNA.                                                          | 227.4947 | 318.1897 | 0.028563216 |
| Dld           | Mus musculus dihydroipoamide dehydrogenase (Dld), mRNA.                                                                         | 301.5803 | 489.0191 | 0.028621051 |
| Tceb3         | Mus musculus transcription elongation factor B (SIII), polypeptide 3 (Tceb3), mRNA.                                             | 86.85007 | 129.1475 | 0.028685078 |
| Sec16b        | Mus musculus SEC16 homolog B ( <i>S. cerevisiae</i> ) (Sec16b), mRNA.                                                           | 362.2782 | 547.381  | 0.028797082 |
| Map2k4        | Mus musculus mitogen activated protein kinase kinase 4 (Map2k4), mRNA.                                                          | 260.0203 | 362.1811 | 0.028764771 |
| Tmem183a      | Mus musculus transmembrane protein 183A (Tmem183a), transcript variant 2, mRNA.                                                 | 586.7593 | 439.8597 | 0.028725351 |
| Tmem184c      | Mus musculus transmembrane protein 184C (Tmem184c), mRNA.                                                                       | 30.18798 | 53.12312 | 0.028703955 |
| Zcchc6        | Mus musculus zinc finger, CCHC domain containing 6 (Zcchc6), mRNA.                                                              | 363.1554 | 258.4244 | 0.028688121 |
| Dek           | Mus musculus DEK oncogene (DNA binding) (Dek), mRNA.                                                                            | 77.16917 | 35.01651 | 0.028707703 |
| BC017643      | Mus musculus cDNA sequence BC017643 (BC017643), mRNA.                                                                           | 59.75016 | 91.93324 | 0.02868222  |
| Gnal1         | Mus musculus guanine nucleotide binding protein-like 1 (Gnal1), mRNA.                                                           | 73.77804 | 49.06754 | 0.028644355 |

|               |                                                                                            |          |          |             |
|---------------|--------------------------------------------------------------------------------------------|----------|----------|-------------|
| Cog6          | Mus musculus component of oligomeric golgi complex 6 (Cog6), mRNA.                         | 166.987  | 236.089  | 0.028741888 |
| Lrrc8a        | Mus musculus leucine rich repeat containing 8A (Lrrc8a), mRNA.                             | 115.4777 | 173.2417 | 0.028869516 |
| Nbr1          |                                                                                            | 49.67451 | 88.84198 | 0.028894998 |
| Ehd4          | Mus musculus EH-domain containing 4 (Ehd4), mRNA.                                          | 107.2178 | 75.55984 | 0.028902792 |
| Sin3a         | Mus musculus transcriptional regulator, SIN3A (yeast) (Sin3a), mRNA.                       | 93.08204 | 64.43173 | 0.028927831 |
| Dpm2          | Mus musculus dolichol-phosphate (beta-D) mannosyltransferase 2 (Dpm2), mRNA.               | 169.7077 | 103.0903 | 0.029249463 |
| Rtn3          | Mus musculus reticulon 3 (Rtn3), transcript variant 3, mRNA.                               | 128.4644 | 85.32476 | 0.029971665 |
| Nol1          | Mus musculus nucleolar protein 1 (Nol1), mRNA.                                             | 33.60007 | 59.21864 | 0.030033697 |
| Dnajb9        | Mus musculus Dnaj (Hsp40) homolog, subfamily B, member 9 (Dnajb9), mRNA.                   | 995.607  | 1491.846 | 0.0302077   |
| Pbld          | Mus musculus phenazine biosynthesis-like protein domain containing (Pbld), mRNA.           | 607.9585 | 322.174  | 0.030453237 |
| Aco1          | Mus musculus aconitase 1 (Aco1), mRNA.                                                     | 161.6451 | 227.9709 | 0.030481139 |
| 1300001I01Rik | Mus musculus RIKEN cDNA 1300001I01 gene (1300001I01Rik), mRNA.                             | 360.2486 | 544.3177 | 0.030529512 |
| Ppic          | Mus musculus peptidylprolyl isomerase C (Ppic), mRNA.                                      | 52.742   | 89.22122 | 0.030485019 |
| 1810064F22Rik | Mus musculus RIKEN cDNA 1810064F22 gene (1810064F22Rik), mRNA.                             | 6994.263 | 4931.471 | 0.030464075 |
| Flad1         | Mus musculus RFad1, flavin adenine dinucleotide synthetase, homolog (yeast) (Flad1), mRNA. | 473.8254 | 332.1309 | 0.030490985 |
| Rpl24         | Mus musculus ribosomal protein L24 (Rpl24), mRNA.                                          | 2211.379 | 1070.929 | 0.03047136  |
| Cdc42ep4      | Mus musculus CDC42 effector protein (Rho GTPase binding) 4 (Cdc42ep4), mRNA.               | 239.6539 | 139.9253 | 0.030584764 |
| Csda          | Mus musculus cold shock domain protein A (Csda), mRNA.                                     | 28.67391 | 55.31192 | 0.030557467 |
| Prkd3         | Mus musculus protein kinase D3 (Prkd3), mRNA.                                              | 419.5611 | 290.9424 | 0.0306644   |
| Mfn1          | Mus musculus mitofusin 1 (Mfn1), nuclear gene encoding mitochondrial protein, mRNA.        | 269.3498 | 183.8053 | 0.030748825 |
| Hal           | Mus musculus histidine ammonia lyase (Hal), mRNA.                                          | 2997.48  | 4071.824 | 0.030781549 |
| Phlda1        | Mus musculus pleckstrin homology-like domain, family A, member 1 (Phlda1), mRNA.           | 326.8385 | 718.9731 | 0.030993051 |
| Ubl7          | Mus musculus ubiquitin-like 7 (bone marrow stromal cell-derived) (Ubl7), mRNA.             | 519.722  | 395.5815 | 0.03208988  |
| Frrs1         | Mus musculus ferric-chelate reductase 1 (Frrs1), mRNA.                                     | 60.88762 | 92.51311 | 0.032077001 |
| Nol14         | Mus musculus nucleolar protein 14 (Nol14), mRNA.                                           | 115.5222 | 82.51208 | 0.032219688 |
| Ipo5          | Mus musculus importin 5 (Ipo5), mRNA.                                                      | 89.83409 | 130.9048 | 0.032366727 |
| Nudt9         | Mus musculus nudix (nucleoside diphosphate linked moiety X)-type motif 9 (Nudt9), mRNA.    | 209.3225 | 291.3558 | 0.032494596 |
| Hdac3         | Mus musculus histone deacetylase 3 (Hdac3), mRNA.                                          | 347.2069 | 253.7771 | 0.032449155 |
| Pex14         | Mus musculus peroxisomal biogenesis factor 14 (Pex14), mRNA.                               | 586.7252 | 440.6678 | 0.032784724 |
| Map3k3        | Mus musculus mitogen-activated protein kinase kinase kinase 3 (Map3k3), mRNA.              | 108.3365 | 67.14502 | 0.033447722 |
| Stard8        | Mus musculus START domain containing 8 (Stard8), mRNA.                                     | 86.29533 | 75.86729 | 0.033530147 |
| Per1          | Mus musculus period homolog 1 (Drosophila) (Per1), mRNA.                                   | 113.1346 | 157.3206 | 0.033703596 |
| 1110012D08Rik | Mus musculus RIKEN cDNA 1110012D08 gene (1110012D08Rik), mRNA.                             | 56.01263 | 35.27204 | 0.033660372 |
| Aqp9          | Mus musculus aquaporin 9 (Aqp9), mRNA.                                                     | 3425.498 | 2264.228 | 0.035177863 |
| Acaa1b        | Mus musculus acetyl-Coenzyme A acyltransferase 1B (Acaa1b), mRNA.                          | 13969.68 | 8811.359 | 0.035129006 |

|               |                                                                                                                    |          |          |             |
|---------------|--------------------------------------------------------------------------------------------------------------------|----------|----------|-------------|
| Scye1         | Mus musculus small inducible cytokine subfamily E, member 1 (Scye1), mRNA.                                         | 430.7334 | 627.4966 | 0.035219822 |
| Agxt2         | Mus musculus alanine-glyoxylate aminotransferase 2 (Agxt2), nuclear gene encoding mitochondrial protein, mRNA.     | 299.7482 | 419.8309 | 0.035203457 |
| Casp6         | Mus musculus caspase 6 (Casp6), mRNA.                                                                              | 192.004  | 280.4089 | 0.03525302  |
| Pbrm1         | Mus musculus polybromo 1 (Pbrm1), mRNA.                                                                            | 175.4467 | 263.1884 | 0.03602195  |
| Scaf1         | Mus musculus SR-related CTD-associated factor 1 (Scaf1), mRNA.                                                     | 77.11419 | 116.8235 | 0.036069404 |
| Pabpc4        | Mus musculus poly A binding protein, cytoplasmic 4 (Pabpc4), transcript variant 1, mRNA.                           | 26.47272 | 51.63761 | 0.036241868 |
| Dusp23        | Mus musculus dual specificity phosphatase 23 (Dusp23), mRNA.                                                       | 236.6308 | 370.8322 | 0.036481194 |
| Cyp2c37       | Mus musculus cytochrome P450, family 2, subfamily c, polypeptide 37 (Cyp2c37), mRNA. XM_975342                     | 2862.639 | 1909.105 | 0.036507942 |
| Snrp70        | Mus musculus U1 small nuclear ribonucleoprotein polypeptide A (Snrp70), mRNA.                                      | 42.27275 | 67.74355 | 0.036794722 |
| Papss2        | Mus musculus 3'-phosphoadenosine 5'-phosphosulfate synthase 2 (Papss2), mRNA.                                      | 74.04092 | 118.0366 | 0.036790488 |
| 5033414D02Rik | Mus musculus RIKEN cDNA 5033414D02 gene (5033414D02Rik), mRNA.                                                     | 32.69132 | 58.6706  | 0.036941831 |
| Tlk2          | Mus musculus tousled-like kinase 2 (Arabidopsis) (Tlk2), mRNA.                                                     | 188.9128 | 127.8543 | 0.036918932 |
| Extl3         | Mus musculus exostoses (multiple)-like 3 (Extl3), mRNA.                                                            | 74.13888 | 42.28021 | 0.036969594 |
| Med25         | Mus musculus mediator of RNA polymerase II transcription, subunit 25 homolog (yeast) (Med25), mRNA.                | 196.0609 | 111.9056 | 0.036958222 |
| Tusc4         | Mus musculus tumor suppressor candidate 4 (Tusc4), mRNA.                                                           | 305.7602 | 213.045  | 0.036937483 |
| Capn7         | Mus musculus calpain 7 (Capn7), mRNA.                                                                              | 148.2348 | 207.7003 | 0.03692924  |
| Derl2         | Mus musculus Der1-like domain family, member 2 (Derl2), mRNA.                                                      | 184.4785 | 124.3702 | 0.037269217 |
| Chic2         | Mus musculus cysteine-rich hydrophobic domain 2 (Chic2), mRNA.                                                     | 343.6908 | 508.2808 | 0.037305082 |
| Gdf10         | Mus musculus growth differentiation factor 10 (Gdf10), mRNA.                                                       | 110.1906 | 69.94329 | 0.038143502 |
| Sec63         | Mus musculus SEC63-like (S. cerevisiae) (Sec63), mRNA.                                                             | 581.5249 | 447.4388 | 0.038273303 |
| Park7         | Mus musculus Parkinson disease (autosomal recessive, early onset) 7 (Park7), mRNA.                                 | 3362.364 | 2430.422 | 0.038329324 |
| Lrrk1         | Mus musculus leucine-rich repeat kinase 1 (Lrrk1), mRNA.                                                           | 58.85739 | 37.92043 | 0.038323414 |
| Trfr2         | Mus musculus transferrin receptor 2 (Trfr2), mRNA.                                                                 | 649.1464 | 729.9359 | 0.038443245 |
| Cdipt         | Mus musculus CDP-diacylglycerol--inositol 3-phosphatidyltransferase (phosphatidylinositol synthase) (Cdipt), mRNA. | 412.3549 | 281.6472 | 0.039215044 |
| Pex6          | Mus musculus peroxisomal biogenesis factor 6 (Pex6), mRNA.                                                         | 455.7397 | 301.2091 | 0.039253754 |
| Plagl2        | Mus musculus pleiomorphic adenoma gene-like 2 (Plagl2), mRNA.                                                      | 51.66016 | 29.40968 | 0.039629582 |
| Peli1         | Mus musculus pellino 1 (Peli1), mRNA.                                                                              | 89.82552 | 127.1907 | 0.039806097 |
| Zfp259        | Mus musculus zinc finger protein 259 (Zfp259), mRNA.                                                               | 327.0389 | 233.8355 | 0.039786296 |
| Ube1c         | Mus musculus ubiquitin-activating enzyme E1C (Ube1c), mRNA.                                                        | 67.60396 | 106.1728 | 0.039883956 |
| Gpr172b       | Mus musculus G protein-coupled receptor 172B (Gpr172b), mRNA.                                                      | 88.13874 | 41.23768 | 0.039849305 |
| Slc4a2        | Mus musculus solute carrier family 4 (anion exchanger), member 2 (Slc4a2), mRNA.                                   | 204.2355 | 153.2619 | 0.039984998 |
| BC003885      |                                                                                                                    | 117.0777 | 170.2124 | 0.040249196 |

|               |                                                                                                                  |          |          |             |
|---------------|------------------------------------------------------------------------------------------------------------------|----------|----------|-------------|
| Wwc2          | Mus musculus WW, C2 and coiled-coil domain containing 2 (Wwc2), mRNA.                                            | 148.309  | 86.7656  | 0.040280526 |
| Fundc1        | Mus musculus FUN14 domain containing 1 (Fundc1), mRNA.                                                           | 45.92317 | 75.9083  | 0.040633932 |
| Adh4          | Mus musculus alcohol dehydrogenase 4 (class II), pi polypeptide (Adh4), mRNA.                                    | 531.0891 | 409.226  | 0.041072426 |
| Mfge8         |                                                                                                                  | 253.9362 | 188.4123 | 0.041194635 |
| Tax1bp1       | Mus musculus Tax1 (human T-cell leukemia virus type I) binding protein 1 (Tax1bp1), mRNA.                        | 1182.698 | 1602.343 | 0.041188005 |
| Ei24          | Mus musculus etoposide induced 2.4 mRNA (Ei24), mRNA.                                                            | 2020.108 | 2708.235 | 0.041134065 |
| Psm7          | Mus musculus proteasome (prosome, macropain) subunit, alpha type 7 (Psm7), mRNA.                                 | 1135.783 | 868.2402 | 0.041297551 |
| Tsg101        | Mus musculus tumor susceptibility gene 101 (Tsg101), mRNA.                                                       | 170.8271 | 271.4881 | 0.04143313  |
| Plxna1        | Mus musculus plexin A1 (Plxna1), mRNA.                                                                           | 198.8918 | 302.2043 | 0.041448705 |
| 5730469M10Rik | Mus musculus RIKEN cDNA 5730469M10 gene (5730469M10Rik), mRNA.                                                   | 275.7996 | 376.2564 | 0.041435919 |
| Ddx27         | Mus musculus DEAD (Asp-Glu-Ala-Asp) box polypeptide 27 (Ddx27), mRNA.                                            | 170.7859 | 112.0151 | 0.041423687 |
| Echdc3        | Mus musculus enoyl Coenzyme A hydratase domain containing 3 (Echdc3), mRNA.                                      | 126.9629 | 178.0854 | 0.041635358 |
| Wipi2         | Mus musculus WD repeat domain, phosphoinositide interacting 2 (Wipi2), mRNA.                                     | 96.60857 | 72.48831 | 0.041845969 |
| Tspan14       | Mus musculus tetraspanin 14 (Tspan14), mRNA.                                                                     | 220.092  | 149.2245 | 0.042131869 |
| Inhbe         | Mus musculus inhibin beta E (Inhbe), mRNA.                                                                       | 113.9366 | 28.08862 | 0.042189326 |
| Tgm2          | Mus musculus transglutaminase 2, C polypeptide (Tgm2), mRNA.                                                     | 780.9645 | 515.4664 | 0.042691088 |
| Prkaa2        |                                                                                                                  | 71.18397 | 22.48963 | 0.043083663 |
| 1110002B05Rik | Mus musculus RIKEN cDNA 1110002B05 gene (1110002B05Rik), mRNA.                                                   | 585.7426 | 802.4398 | 0.043128144 |
| BC031853      | Mus musculus cDNA sequence BC031853 (BC031853), mRNA.                                                            | 61.90649 | 97.36044 | 0.04324717  |
| EG277333      | Mus musculus predicted gene, EG277333 (EG277333), non-coding RNA.                                                | 278.3051 | 178.1673 | 0.043908071 |
| D4Ert22e      | Mus musculus DNA segment, Chr 4, ERATO Doi 22, expressed (D4Ert22e), transcript variant 1, mRNA.                 | 412.4931 | 288.0093 | 0.044129478 |
| Ccdc86        | Mus musculus coiled-coil domain containing 86 (Ccdc86), mRNA.                                                    | 273.6629 | 162.0537 | 0.044268415 |
| Eif4a2        | Mus musculus eukaryotic translation initiation factor 4A2 (Eif4a2), mRNA.                                        | 2627.092 | 3896.88  | 0.044330223 |
| Dmgdh         | Mus musculus dimethylglycine dehydrogenase precursor (Dmgdh), nuclear gene encoding mitochondrial protein, mRNA. | 557.0967 | 267.3589 | 0.044517073 |
| Nrd1          | Mus musculus nardilysin, N-arginine dibasic convertase, NRD convertase 1 (Nrd1), mRNA.                           | 624.3038 | 351.3968 | 0.044592111 |
| Dom3z         | Mus musculus DOM-3 homolog Z (C. elegans) (Dom3z), mRNA.                                                         | 135.2357 | 101.1065 | 0.045399724 |
| Gbp3          | Mus musculus guanylate nucleotide binding protein 3 (Gbp3), mRNA.                                                | 36.33072 | 58.61753 | 0.045375574 |
| Hrsp12        | Mus musculus heat-responsive protein 12 (Hrsp12), mRNA.                                                          | 2005.988 | 3244.557 | 0.045687963 |
| Rnf125        | Mus musculus ring finger protein 125 (Rnf125), mRNA.                                                             | 172.4767 | 73.05661 | 0.045724525 |
| Cpt1b         | Mus musculus carnitine palmitoyltransferase 1b, muscle (Cpt1b), mRNA.                                            | 58.79869 | 24.06736 | 0.045707066 |
| BC030476      | Mus musculus cDNA sequence BC030476 (BC030476), mRNA.                                                            | 65.03427 | 36.52863 | 0.045719053 |
| Gtf2h3        | Mus musculus general transcription factor IIH, polypeptide 3 (Gtf2h3), mRNA.                                     | 180.9663 | 135.8108 | 0.045672506 |



|               |                                                                                                                     |          |          |             |
|---------------|---------------------------------------------------------------------------------------------------------------------|----------|----------|-------------|
| Rars          | Mus musculus arginyl-tRNA synthetase (Rars), mRNA.                                                                  | 197.0042 | 301.3949 | 0.045670439 |
| Prhoxnb       | Mus musculus parahox cluster neighbor (Prhoxnb), mRNA.                                                              | 149.5303 | 219.5822 | 0.045735272 |
| Cops2         | Mus musculus COP9 (constitutive photomorphogenic) homolog, subunit 2 (Arabidopsis thaliana) (Cops2), mRNA.          | 828.6888 | 1185.86  | 0.045704828 |
| Mknk1         | Mus musculus MAP kinase-interacting serine/threonine kinase 1 (Mknk1), mRNA.                                        | 149.0386 | 110.5994 | 0.045814042 |
| LOC100045963  | PREDICTED: Mus musculus similar to Ring finger protein 126 (LOC100045963), mRNA.                                    | 47.93504 | 115.3807 | 0.045808584 |
| Pgm2          | Mus musculus phosphoglucomutase 2 (Pgm2), mRNA.                                                                     | 1741.969 | 1360.891 | 0.045870539 |
| Psmc3         | Mus musculus proteasome (prosome, macropain) 26S subunit, ATPase 3 (Psmc3), mRNA.                                   | 911.348  | 691.9843 | 0.04594683  |
| Atp5f1        | Mus musculus ATP synthase, H+ transporting, mitochondrial FO complex, subunit b, isoform 1 (Atp5f1), mRNA.          | 1230.892 | 1697.027 | 0.046231499 |
| Crls1         | Mus musculus cardiolipin synthase 1 (Crls1), transcript variant 2, mRNA.                                            | 136.2809 | 211.4725 | 0.046197142 |
| Bag1          | Mus musculus Bcl2-associated athanogene 1 (Bag1), mRNA.                                                             | 2019.889 | 1481.422 | 0.04641731  |
| Serpinf1      | Mus musculus serine (or cysteine) peptidase inhibitor, clade F, member 1 (Serpinf1), mRNA.                          | 8351.518 | 6547.32  | 0.046525873 |
| Fadd          | Mus musculus Fas (TNFRSF6)-associated via death domain (Fadd), mRNA.                                                | 70.40063 | 44.75151 | 0.046506624 |
| Dicer1        | Mus musculus Dicer1, Dcr-1 homolog (Drosophila) (Dicer1), mRNA.                                                     | 44.17426 | 79.51588 | 0.047343658 |
| Map2k2        | Mus musculus mitogen activated protein kinase kinase 2 (Map2k2), mRNA.                                              | 860.2377 | 590.8293 | 0.047336975 |
| Slc25a45      | Mus musculus solute carrier family 25, member 45 (Slc25a45), mRNA.                                                  | 477.8715 | 324.5588 | 0.047308471 |
| Ran           | Mus musculus RAN, member RAS oncogene family (Ran), mRNA.                                                           | 56.21405 | 84.13152 | 0.047681403 |
| Gpd1          | Mus musculus glycerol-3-phosphate dehydrogenase 1 (soluble) (Gpd1), mRNA.                                           | 269.2368 | 169.8684 | 0.047633976 |
| Eif3g         | Mus musculus eukaryotic translation initiation factor 3, subunit G (Eif3g), mRNA.                                   | 1424.493 | 1113.78  | 0.047821848 |
| Nrn1          | Mus musculus neuritin 1 (Nrn1), mRNA.                                                                               | 1044.892 | 1392.167 | 0.048312728 |
| Fech          | Mus musculus ferrochelatae (Fech), mRNA.                                                                            | 62.62922 | 88.82352 | 0.048434908 |
| Mpp1          | Mus musculus membrane protein, palmitoylated (Mpp1), mRNA.                                                          | 114.9935 | 163.3056 | 0.048438991 |
| 4933407N01Rik |                                                                                                                     | 359.0274 | 538.2129 | 0.048635836 |
| Klhdc10       | Mus musculus kelch domain containing 10 (Klhdc10), mRNA.                                                            | 725.7306 | 555.5624 | 0.048597998 |
| Kif21a        | Mus musculus kinesin family member 21A (Kif21a), mRNA.                                                              | 284.262  | 172.0809 | 0.049061979 |
| Nudt4         | Mus musculus nudix (nucleoside diphosphate linked moiety X)-type motif 4 (Nudt4), mRNA.                             | 889.7047 | 1185.413 | 0.049015049 |
| Dera          | Mus musculus 2-deoxyribose-5-phosphate aldolase homolog (C. elegans) (Dera), mRNA.                                  | 142.9411 | 88.67365 | 0.049160976 |
| Pcbp1         | Mus musculus poly(rC) binding protein 1 (Pcbp1), mRNA.                                                              | 1283.064 | 1705.904 | 0.049257486 |
| Gpc1          | Mus musculus glypican 1 (Gpc1), mRNA.                                                                               | 210.4008 | 143.6503 | 0.049245854 |
| Ppfibp2       | Mus musculus protein tyrosine phosphatase, receptor-type, F interacting protein, binding protein 2 (Ppfibp2), mRNA. | 87.55482 | 60.07401 | 0.049715726 |
