# Supplementary material
Source: PubMed Central journal article supplement (PMC4687559)
Supplement: pnas.1513872112.sd02.pdf [file pnas.1513872112.sd02.pdf]

| Symbol  | cont.AVG_Signal | GRA.AVG_Signal | DEFINITION                                                                           | log2fold cont vs GRA | function    | FDR         |
|---------|-----------------|----------------|--------------------------------------------------------------------------------------|----------------------|-------------|-------------|
| CAP1    | 199.9683        | 566.3314       | Mus musculus CAP, adenylate cyclase-associated protein 1 (yeast) (Cap1), mRNA.       | 1.501875207          | hormone/sig | 6.60269E-09 |
| Edn1    | 388.194         | 1375.206       | Mus musculus endothelin 1 (Edn1), mRNA.                                              | 1.82479802           | hormone/sig | 2.1625E-08  |
| Fgf21   | 30.05771        | 83.28802       | Mus musculus fibroblast growth factor 21 (Fgf21), mRNA.                              | 1.470373897          | hormone/sig | 1.13925E-07 |
| Vegfb   | 461.3793        | 1238.024       | Mus musculus vascular endothelial growth factor B (Vegfb), mRNA.                     | 1.424014099          | hormone/sig | 1.27459E-07 |
| Thbs1   | 28.20282        | 100.4722       | Mus musculus thrombospondin 1 (Thbs1), mRNA.                                         | 1.832885042          | hormone/sig | 1.43087E-07 |
| Nenf    | 580.0191        | 1227.511       | Mus musculus neuron derived neurotrophic factor (Nenf), mRNA.                        | 1.081563639          | hormone/sig | 1.83163E-06 |
| Adipoq  | 11269.91        | 16540.57       | Mus musculus adiponectin, C1Q and collagen domain containing (Adipoq), mRNA.         | 0.553532957          | hormone/sig | 7.25908E-05 |
| Smoc1   | 1084.077        | 1595.055       | Mus musculus SPARC related modular calcium binding 1 (Smoc1), mRNA.                  | 0.557138939          | hormone/sig | 0.000605653 |
| Mmrn2   | 764.6987        | 1551.838       | Mus musculus multimerin 2 (Mmrn2), mRNA.                                             | 1.021014632          | hormone/sig | 0.000778001 |
| Lep     | 269.578         | 929.9665       | Mus musculus leptin (Lep), mRNA.                                                     | 1.786475983          | hormone/sig | 0.024139699 |
| Ttr     | 271.3686        | 10657.89       | Mus musculus transthyretin (Ttr), mRNA.                                              | 5.295524242          | hormone/sig | 0.033542193 |
| Cxcl1   | 121.2716        | 227.3131       | Mus musculus chemokine (C-X-C motif) ligand 1 (Cxcl1), mRNA.                         | 0.906439096          | immune      | 8.53976E-08 |
| Cxcl12  | 721.4822        | 965.256        | Mus musculus chemokine (C-X-C motif) ligand 12 (Cxcl12), transcript variant 1, mRNA. | 0.419947815          | immune      | 0.000162385 |
| Ly6a    | 4854.054        | 8509.603       | Mus musculus lymphocyte antigen 6 complex, locus A (Ly6a), mRNA.                     | 0.809901669          | immune      | 0.000201602 |
| Slpi    | 1207.238        | 4351.979       | Mus musculus secretory leukocyte peptidase inhibitor (Slpi), mRNA.                   | 1.849961472          | immune      | 0.045484104 |
| Apoc2   | 47.28062        | 107.2392       | Mus musculus apolipoprotein C-II (Apoc2), mRNA.                                      | 1.181511503          | lpl         | 0.000364157 |
| Apoa2   | 553.2561        | 15808.75       | Mus musculus apolipoprotein A-II (Apoa2), mRNA.                                      | 4.836632035          | lpl         | 0.007127313 |
| Apoc1   | 4374.27         | 11171.41       | Mus musculus apolipoprotein C-I (Apoc1), mRNA.                                       | 1.352697109          | lpl         | 0.015693018 |
| Angptl4 | 7276.364        | 10690.15       | Mus musculus angiopoietin-like 4 (Angptl4), mRNA.                                    | 0.554992476          | lpl         | 0.028000665 |
| Apoc3   | 1628.007        | 7056.521       | Mus musculus apolipoprotein C-III (Apoc3), mRNA.                                     | 2.11585018           | lpl         | 0.041778102 |
| Hyal1   | 59.23618        | 156.7654       | Mus musculus hyaluronoglucosaminidase 1 (Hyal1), mRNA.                               | 1.404056662          | other       | 1.53139E-10 |
| Metrn   | 35.47311        | 98.76293       |                                                                                      | 1.477243818          | other       | 6.7579E-09  |
| Gfod2   | 110.2553        | 183.3197       | Mus musculus glucose-fructose oxidoreductase domain containing 2 (Gfod2), mRNA.      | 0.733513822          | other       | 4.89786E-05 |
| Mup2    | 1045.016        | 13162.77       | Mus musculus major urinary protein 2 (Mup2), transcript variant 1, mRNA.             | 3.654866188          | other       | 0.000882743 |
| Mup1    | 589.0097        | 16787.5        | Mus musculus major urinary protein 1 (Mup1), mRNA.                                   | 4.832952196          | other       | 0.000907041 |

|           |          |          |                                                                                              |             |        |             |
|-----------|----------|----------|----------------------------------------------------------------------------------------------|-------------|--------|-------------|
| Lrrn4cl   | 184.6751 | 389.4126 | Mus musculus LRRN4 C-terminal like (Lrrn4cl), mRNA.                                          | 1.076310206 | other  | 0.001237389 |
| Amy1      | 956.8184 | 1560.405 | Mus musculus amylase 1, salivary (Amy1), mRNA.                                               | 0.705603488 | other  | 0.008739805 |
| Ccdc134   | 99.36922 | 176.8745 | Mus musculus coiled-coil domain containing 134 (Ccdc134), mRNA.                              | 0.831855124 | other  | 0.018009114 |
| Serpina3n | 6618.349 | 11298.65 | Mus musculus serine (or cysteine) peptidase inhibitor, clade A, member 3N (Serpina3n), mRNA. | 0.77160713  | serpin | 0.002015472 |
| Serpinf1  | 2205.55  | 2928.073 | Mus musculus serine (or cysteine) peptidase inhibitor, clade F, member 1 (Serpinf1), mRNA.   | 0.408813055 | serpin | 0.016004871 |
| Serpina1d | 350.7387 | 11026.82 | Mus musculus serine (or cysteine) peptidase inhibitor, clade A, member 1d (Serpina1d), mRNA. | 4.974476361 | serpin | 0.029522723 |
| Serpina1b | 397.0233 | 13627.65 | Mus musculus serine (or cysteine) peptidase inhibitor, clade A, member 1b (Serpina1b), mRNA. | 5.101169313 | serpin | 0.044994693 |
