# Supplementary material
Source: PubMed Central journal article supplement (PMC4687559)
Supplement: pnas.1513872112.sd03.pdf [file pnas.1513872112.sd03.pdf]

| SYMBOL        | GRA AVG  | DEFINITION                                                                                                                             | log2 fold GRA over cont | fdr corrected p-val |
|---------------|----------|----------------------------------------------------------------------------------------------------------------------------------------|-------------------------|---------------------|
| 2700060E02Rik | 7434.889 | RIKEN cDNA 2700060E02 gene (2700060E02Rik), .                                                                                          | 0.383812793             | 0.019600657         |
| Adipoq        | 16540.57 | adiponectin, C1Q and collagen domain containing (Adipoq), .                                                                            | 0.553532957             | 0.00026007          |
| Angptl4       | 10690.15 | angiopoietin-like 4 (Angptl4), .                                                                                                       | 0.554992476             | 0.023729982         |
| Apoa2         | 15808.75 | apolipoprotein A-II (Apoa2), .                                                                                                         | 4.836632035             | 0.003436353         |
| Apoc1         | 11171.41 | apolipoprotein C-I (Apoc1), .                                                                                                          | 1.352697109             | 0.019850593         |
| Apoc3         | 7056.521 | apolipoprotein C-III (Apoc3), .                                                                                                        | 2.11585018              | 0.010165543         |
| Arl6ip1       | 6190.104 | ADP-ribosylation factor-like 6 interacting protein 1 (Arl6ip1), .                                                                      | 0.519922191             | 0.036613543         |
| Atp5j2        | 8624.181 | ATP synthase, H+ transporting, mitochondrial F0 complex, subunit f, isoform 2 (Atp5j2), nuclear gene encoding mitochondrial protein, . | 1.057225945             | 3.82645E-12         |
| C3            | 11370.27 |                                                                                                                                        | 0.487977528             | 0.020758003         |
| Car3          | 7380.525 | carbonic anhydrase 3 (Car3), .                                                                                                         | -0.547677546            | 0.029255726         |
| Cdo1          | 11985.05 | cysteine dioxygenase 1, cytosolic (Cdo1), .                                                                                            | 0.495058901             | 0.001442471         |
| Cox5b         | 7480.194 |                                                                                                                                        | 0.990063374             | 0.035321838         |
| Dbi           | 9871.458 | diazepam binding inhibitor (Dbi), transcript variant 2, .                                                                              | 0.813789354             | 0.005679787         |
| Ech1          | 7030.994 | enoyl coenzyme A hydratase 1, peroxisomal (Ech1), .                                                                                    | 0.360116268             | 0.030426313         |
| Eif4a2        | 9981.087 | eukaryotic translation initiation factor 4A2 (Eif4a2), .                                                                               | 0.489787766             | 0.001672318         |
| Eif4ebp1      | 5975.057 | eukaryotic translation initiation factor 4E binding protein 1 (Eif4ebp1), .                                                            | 1.010426096             | 1.86206E-11         |
| Glrx5         | 6565.361 | glutaredoxin 5 homolog (S. cerevisiae) (Glrx5), .                                                                                      | 0.821048523             | 2.76383E-05         |
| Hba-a1        | 21382.14 | hemoglobin alpha, adult chain 1 (Hba-a1), .                                                                                            | 0.639107199             | 0.00016723          |
| Hist1h1c      | 6547.146 | histone cluster 1, H1c (Hist1h1c), .                                                                                                   | 0.547172926             | 0.000331527         |
| Hnrnpc        | 5455.608 | heterogeneous nuclear ribonucleoprotein C (Hnrnpc), .                                                                                  | 0.34227444              | 0.042315813         |
| Iscu          | 6780.109 | IscU iron-sulfur cluster scaffold homolog (E. coli) (Iscu), .                                                                          | 0.43733291              | 0.01778235          |
| LOC100047184  | 7307.121 | PREDICTED: similar to proteasome alpha7/C8 subunit (LOC100047184), .                                                                   | 0.492191845             | 0.015215741         |
| LOC100047998  | 5871.141 | PREDICTED: similar to ribosomal protein L37a (LOC100047998), .                                                                         | 0.551453634             | 0.036315609         |
| LOC100048483  | 10236.42 | PREDICTED: similar to cytochrome c oxidase subunit VIII (LOC100048483), .                                                              | 0.862469058             | 1.26198E-07         |
| LOC675813     | 18683.62 | PREDICTED: similar to ribosomal protein S20 (LOC675813), misc RNA.                                                                     | 0.351138272             | 0.035006971         |
| Ly6a          | 8509.603 | lymphocyte antigen 6 complex, locus A (Ly6a), .                                                                                        | 0.809901669             | 8.52695E-05         |
| Mup1          | 16787.5  | major urinary protein 1 (Mup1), .                                                                                                      | 4.832952196             | 8.55625E-05         |
| Mup2          | 13162.77 | major urinary protein 2 (Mup2), transcript variant 1, .                                                                                | 3.654866188             | 0.002167587         |
| Ndufa13       | 7939.892 | NADH dehydrogenase (ubiquinone) 1 alpha subcomplex, 13 (Ndufa13), .                                                                    | 0.866614961             | 0.000131667         |
| Ormdl3        | 6214.068 | ORM1-like 3 (S. cerevisiae) (Ormdl3), .                                                                                                | 0.381484342             | 0.030741399         |
| Prnp          | 7735.496 | prion protein (Prnp), .                                                                                                                | 0.513386488             | 0.021186241         |
| Psmb4         | 5740.027 | proteasome (prosome, macropain) subunit, beta type 4 (Psmb4), .                                                                        | 0.474052479             | 0.002589496         |
| Rpl27         | 5785.416 | ribosomal protein L27 (Rpl27), .                                                                                                       | 0.571434965             | 0.002661749         |
| Rpl38         | 6814.514 | ribosomal protein L38 (Rpl38), transcript variant 1, .                                                                                 | 0.788813686             | 0.000106301         |
| Rpl41         | 20970.15 | ribosomal protein L41 (Rpl41), .                                                                                                       | 0.370331233             | 0.024813426         |

|           |          |                                                                                                                                                       |             |             |
|-----------|----------|-------------------------------------------------------------------------------------------------------------------------------------------------------|-------------|-------------|
| Rps21     | 8805.866 | ribosomal protein S21 (Rps21), .                                                                                                                      | 0.599136317 | 0.006741366 |
| Rps24     | 6575.233 | ribosomal protein S24 (Rps24), transcript variant 1, .                                                                                                | 0.768299151 | 0.00407016  |
| Rps27l    | 7155.128 | ribosomal protein S27-like (Rps27l), .                                                                                                                | 1.128695924 | 2.47375E-35 |
| Sdpr      | 11224.65 | serum deprivation response (Sdpr), .                                                                                                                  | 0.46876483  | 0.03076393  |
| Serpina1b | 13627.65 | serine (or cysteine) peptidase inhibitor, clade A, member 1b (Serpina1b), .                                                                           | 5.101169313 | 0.023626492 |
| Serpina1d | 11026.82 | serine (or cysteine) peptidase inhibitor, clade A, member 1d (Serpina1d), .                                                                           | 4.974476361 | 0.024940575 |
| Serpina3n | 11298.65 | serine (or cysteine) peptidase inhibitor, clade A, member 3N (Serpina3n), .                                                                           | 0.77160713  | 0.000350761 |
| Slc25a5   | 6922.466 | solute carrier family 25 (mitochondrial carrier, adenine nucleotide translocator), member 5 (Slc25a5), nuclear gene encoding mitochondrial protein, . | 0.488794454 | 0.001740831 |
| Sod1      | 9057.116 | superoxide dismutase 1, soluble (Sod1), .                                                                                                             | 0.747723228 | 2.01141E-07 |
| Stt3b     | 8844.159 | STT3, subunit of the oligosaccharyltransferase complex, homolog B ( <i>S. cerevisiae</i> ) (Stt3b), .                                                 | 0.527507598 | 0.000572203 |
| Sult1a1   | 7679.125 | sulfotransferase family 1A, phenol-preferring, member 1 (Sult1a1), .                                                                                  | 0.717786012 | 2.14815E-05 |
| Ttr       | 10657.89 | transthyretin (Ttr), .                                                                                                                                | 5.295524242 | 0.019791212 |
| Txnip     | 10826.42 | thioredoxin interacting protein (Txnip), transcript variant 1, .                                                                                      | 0.77360439  | 0.002463604 |
| Uqcr      | 6074.836 | ubiquinol-cytochrome c reductase (6.4kD) subunit (Uqcr), .                                                                                            | 1.069270651 | 8.13335E-10 |
| Wbp2      | 5752.439 | WW domain binding protein 2 (Wbp2), .                                                                                                                 | 0.402834389 | 0.013331362 |
